# Supplementary material
Source: PubMed Central journal article supplement (PMC9992313)
Supplement: NIHMS1867500-supplement-1.pdf [file NIHMS1867500-supplement-1.pdf]

# 1 SUPPLEMENTARY METHODS

## 2 Human Subjects Recruitment and Ethics Declaration

### 3 Hildebrandt Laboratory

4 The study was approved by the institutional review board (IRB) of Boston Children's Hospital (BCH).  
5 We obtained informed consent, clinical data, pedigree information, and blood and/or saliva samples  
6 for DNA extraction from subjects who had at least one occurrence of nephrolithiasis or demonstration  
7 of nephrocalcinosis on renal ultrasound, manifesting before the age of 25 years. Subjects with a  
8 potential secondary cause of NL such as prematurity or use of loop diuretics were excluded from the  
9 study.

### 11 Khaliq Laboratory

12 Subjects were recruited during admission for nephrolithiasis, which was confirmed by abdominal  
13 ultrasound. The subjects were admitted to one of 5 different tertiary care hospitals in Punjab,  
14 Pakistan from July 2014 to December 2016. Subjects received informed consent and provided  
15 clinical information (confirmed by their urologist and/or medical records), family history for pedigree  
16 construction, and a blood sample for DNA extraction. Consanguinity was determined by history from  
17 adult subjects and/or guardians for pediatric cases by asking if parents of subjects were related. Ten  
18 subjects did not consent to the study, and 7 subjects were excluded as they had an evident  
19 secondary cause of NL (including urinary tract infections and secondary hyperoxaluria). Of the  
20 remaining 242 families, adequate DNA samples for genetic studies were obtained in 235. For 31  
21 families, additional family members were recruited upon consent for clinical information and DNA  
22 submission, allowing for multi-generational pedigree construction. Serum chemistries, urine  
23 metabolites and stone analyses were requested and obtained when available. In total, the cohort  
24 consisted of 440 individuals (235 initial probands, 115 additional affected family members and 90

1 unaffected family members) in 235 families. The study was approved by the institutional review board  
2 of Boston Children's Hospital and the Ethical Review Committee for Medical and Biomedical  
3 Research, University of Health Sciences, Lahore, Pakistan. It adheres to the Declaration of Helsinki.  
4

#### 5 Nelson Laboratory

6 The study was approved by the institutional review board (IRB) of Boston Children's Hospital (BCH).  
7 Subjects were recruited from children presenting with a first clinical episode of urolithiasis at the clinic  
8 of the Department of Urology at Children's Hospital Boston (Boston MA). Subjects for this study  
9 consisted of male and females age 0 years to 21 years presenting with an initial clinical episode of  
10 urolithiasis, defined as diagnosis of stone(s) in the kidney or ureter based on imaging studies, or  
11 passage of such a stone and verification of stone passage. Subjects completed a comprehensive  
12 enrollment interview, including complete medical history of the enrolled subject. DNA samples were  
13 collected for genetic studies.  
14

#### 15 Sayer Laboratory

16 Patients with kidneys stones were recruited from the regional lithotripsy unit, The Newcastle upon  
17 Tyne Hospitals NHS Foundation Trust. Patients gave informed written consent to these studies.  
18 Clinical and biochemical data were reviewed. DNA was obtained from patients and relatives where  
19 available. The study was approved by the Newcastle upon Tyne Research Ethics Committee  
20 (Reference 2003/163).  
21

#### 22 Halbritter Laboratory

23 445 study participants with idiopathic NL/NC were enrolled consecutively between June 2016 and  
24 October 2018, 276 of which were recruited during admission for NL intervention in the Department of  
25 Urology at the University Hospital Leipzig. Study enrollment was based on the clinical diagnosis of

1 NL/NC. Excluded were subjects with primary hyperparathyroidism and patients with no proof of stone  
2 formation upon intervention and imaging. Blood samples were drawn for DNA-extraction after written  
3 informed consent. The Medical Ethical Committee of the University of Leipzig (Leipzig, Germany)  
4 approved this study (Ethics vote 159/14-ff).

## 6 **Exome sequencing (ES)**

7 Exome sequencing was performed as previously described<sup>1,2</sup> to discover a novel genetic cause of  
8 NL/NC disease using Agilent SureSelect™ human exome capture arrays (Thermo Fisher Scientific)  
9 with next generation sequencing (NGS) on an Illumina™ platform. Sequence reads were mapped  
10 against the human reference genome (NCBI build 37/hg19) using CLC Genomics Workbench  
11 (version 6.5.2) (CLC bio). Genetic location information is according to the February 2009 Human  
12 Genome Browser data, hg19 assembly (<http://www.genome.ucsc.edu>). Downstream processing of  
13 aligned BAM files were done using Picard and samtools, and SNV calling was done using GATK5.

## 15 **High-Throughput Gene Sequencing**

16 We conducted high-throughput variant analysis with a targeted kidney stone gene panel comprising  
17 the following known and candidate genes: ADCY10, AGXT, ALPL, AMMECR1, AP2S1, APRT,  
18 ATP6V0A4, ATP6V1B1, CA2, CASR, CLCN5, CLCNKB, CLDN10, CLDN16, CLDN19, CYP24A1,  
19 FAM20A, GDNF, GNA11, GRHPR, HNF4A, HOGA1, HPRT1, KCNJ1, MAGED2, OCRL, OXGR1,  
20 SLC12A1, SLC13A5, SLC22A12, SLC26A1, SLC26A6, SLC26A7, SLC2A9, SLC34A1, SLC34A3,  
21 SLC3A1, SLC4A1, SLC7A9, SLC7A13, SLC9A3R1, TRPV5, TRPV6, VDR, and XDH.

1  
2  
3  
4  
5  
6  
7  
8  
9  
10  
11  
12  
13  
14  
15  
16  
17  
18  
19  
20  
21  
22  
23  
24

**Sanger sequencing (ES)**

The coding exon of *OXGR1* was amplified by PCR in NL/NC cases using the following primers: Forward 5'-AGGCTGATCTGTTGGTCCTG-3', Reverse 5'-TCATTTGATTCATATTGCCAAAC-3'. These amplified products were sequenced using the Sanger sequencing method. The sequencing data was analyzed using the CLC Genomics Workbench (version 6.5.2) software (CLC Bio, Aarhus, Denmark). The data was aligned to the *OXGR1* reference genome sequence (GRCh37 Chromosome 13: 97,637,973-97,646,984; NM\_080818).

**Homozygosity Mapping (HM)**

For subject B1467\_22, the generated VCF file was subsequently used in homozygosity mapper to identify regions of homozygosity based on non-parametric lod (NPL) scores<sup>3</sup>. Genetic regions of homozygosity by descent were plotted across the genome as candidate regions for recessive genes as previously described<sup>4,5</sup>.

**Variant Calling**

Variant calling was performed as previously described<sup>1,2</sup>. Variants within the *OXGR1* locus and/or 30 known NL/NC genes. The variants included were rare in the population with minor allele frequency <1% in dbSNP147. Recessive variants during exome data analysis were included if there were no homozygotes in ExAC and gnomAD databases and minor allele frequency was less than 1%. For dominant variant analysis in the index family B1467, variants were included if there were no homozygotes in ExAC and gnomAD databases and minor allele frequency was less than 0.1%. In subsequent *OXGR1* sequencing in the NL/NC aggregated cohort, variants were filtered with more stringent criteria of no homozygotes and fewer than 5 heterozygotes in ExAC, and no homozygotes

1 and fewer than 10 heterozygotes in gnomAD. Additionally, variants were non-synonymous and/or  
2 located within splice-sites ( $\pm 6$  nucleotides from exon-intron junctions). Subsequently, variant severity  
3 was stratified based on protein impact (truncating frameshift or nonsense variants, essential or  
4 extended splice-site variants, and missense variants). Splice-site variants were assessed by *in silico*  
5 tools MaxEnt and NNSPLICE splice-site variant prediction scores as well as conservation across  
6 human splice-sites as described previously<sup>1,2</sup>. Missense variants were assessed based on SIFT,  
7 MutationTaster, PolyPhen 2.0 and CADD prediction scores and evolutionary conservation based on  
8 manually derived multiple sequence alignments. All remaining variants were confirmed in original  
9 subject DNA by Sanger sequencing with segregation in family members when DNA available.

## 10 **ExAC and gnomAD exome/genome aggregation databases**

11 ExAC and gnomAD databases contain exome and genome data aggregated from worldwide cohorts  
12 (60,706 samples and 141,456 samples, respectively)<sup>6,7</sup>. Cohort subjects with pediatric disease and  
13 their first/second degree relatives were excluded, although certain biobanks may rarely include such  
14 cases at a frequency presumed to be lower than the general population. These databases were  
15 employed to assess the frequency of individual variants. Moreover, all *OXGR1* variants in the ExAC  
16 cohort were analyzed for deleteriousness as described in the **Variation Calling** section.

## 18 **Accession numbers**

19 Human *OXGR1* full-length protein (GenBank accession NP\_001333123), encoded by GenBank  
20 accession NM\_080818, was presumed as the predominant transcript for this study.

## 23 **Structural Modeling**

24 Predicted structure for human *OXGR1* (AF-Q96P68-F1-model\_v2) was downloaded from AlphaFold<sup>8</sup>.  
25 PyMOL was employed to visualize and mutagenize amino acids altered by human *OXGR1* variants,

1 and neighboring amino acid residues within 4 angstroms were identified. Site Directed Mutator was  
2 used to predict biophysical impact of variants on protein stability<sup>9</sup>.

### 4 **Single-cell mRNA sequencing data analysis**

5 Heatmap results depicting differential mRNA expression levels (from z-scores) was based on single-  
6 cell transcriptomics data from seven healthy 4-8 week old C57BL/6 male mice<sup>10</sup>. Processed data from  
7 each set was queried for percent expression in defined cell clusters. Queried data was normalized  
8 using z-score calculation as described<sup>10</sup>.

### 10 **cDNA cloning**

11 cDNA clones were purchased from the following sources: human *OXGR1* (*Harvard PlasmID*  
12 *Database*, HsCD00369784). Mutagenesis was performed using the QuikChange II XL Site-Directed  
13 Mutagenesis Kit (Agilent Technologies). Expression constructs (pRK5-N-Myc) were produced using  
14 LR Clonase (Invitrogen, Thermo Fisher Scientific) following the manufacturer's instructions.

### 16 **Eukaryotic Cell lines**

17 The experiments described here were performed using HEK293T cell. HEK293T cells were  
18 purchased from the ATCC Biological Resource Center.

### 20 **Antibodies, reagents, quantitative PCR reagents**

21 The following primary antibodies were used: rabbit anti-OXGR1 (Novus Biologicals, NBP2-42169),  
22 mouse anti-myc (Santa Cruz, SC-40), mouse HRP-linked anti-beta actin (Abcam, ab20272). HRP-  
23 labeled secondary antibodies were purchased from Santa Cruz Biotechnology.

## ***Xenopus* oocyte reagents**

$^{45}\text{CaCl}_2$  was from PerkinElmer (Waltham, MA). Restriction enzymes and T4 DNA ligase were from New England Biolabs (Beverly, MA). EXPAND High-fidelity PCR System was from Roche (Indianapolis, IN). Other reagent-grade chemicals were from Sigma-Aldrich (St. Louis, MO) or Fluka (Milwaukee, WI).

## ***Xenopus* oocyte solutions**

MBS consisted of (in mM) 88 NaCl, 1 KCl, 2.4 NaHCO<sub>3</sub>, 0.82 MgSO<sub>4</sub>, 0.33 Ca(NO<sub>3</sub>)<sub>2</sub>, 0.41 CaCl<sub>2</sub>, and 10 HEPES (pH 7.4). ND-96 consisted of (in mM) 96 NaCl, 2 KCl, 1.8 CaCl<sub>2</sub>, 1 MgCl<sub>2</sub>, and 5 Na HEPES (pH 7.4). For flux experiments conducted at pH 5.0, Na HEPES was replaced by equimolar MES. NMDG-97 consisted of (in mM) 97.3 N-Methyl-D-glucamine, 2.03 KCl, 1.2 CaCl<sub>2</sub>, 1 MgCl<sub>2</sub>, and 5 Na HEPES (pH 7.4). Cl<sup>-</sup> substitution was achieved by equimolar replacement with cyclamate. Cl<sup>-</sup> salts of K<sup>+</sup>, Ca<sup>2+</sup>, and Mg<sup>2+</sup> were substituted by the corresponding equimolar gluconate salts as necessary.

## **cRNA synthesis and expression in *Xenopus* oocytes**

Capped cRNA was transcribed at 37°C from linearized OXGR1 cDNA template using the Megascript T7 kit (Life Technologies), purified with the RNeasy mini-kit (Qiagen, Valencia, CA), and quantitated by Nanodrop spectrometer (ThermoFisher, Waltham, MA). RNA integrity was verified by formaldehyde gel electrophoresis. Mature female *Xenopus laevis* (Dept. Systems Biology, Harvard Med. School or NASCO, Fort Atkinson, WI) were subjected to partial ovariectomy under hypothermic tricaine anesthesia following protocols approved by the Institutional Animal Care and Use Committee of Beth Israel Deaconess Med. Ctr. Stage VI oocytes were prepared by overnight incubation of ovarian fragments in MBS with 2 mg/ml collagenase B (Alfa Aesar, Ward Hills, MA), followed by a 20

1 min rinse in  $\text{Ca}^{2+}$ -free MBS, with subsequent manual selection and defolliculation as needed. Oocytes  
2 were injected with cRNA on the day of isolation, and maintained at 17.5°C in MBS supplemented with  
3 gentamicin (10  $\mu\text{g}/\text{mL}$ ) for 72 h.

4  
5 *Isotopic influx experiments:*

6 Unidirectional  $^{45}\text{Ca}^{2+}$  influx into individual oocytes was carried out for 30 min in 148  $\mu\text{L}$  NMDG-  
7 97 and 2  $\mu\text{L}$   $^{45}\text{CaCl}_2$  (~2  $\mu\text{Ci}$ ; final bath  $[\text{Ca}^{2+}]$  1.8 mM). Influx experiments were terminated with  
8 three washes of oocytes in ice-cold isotonic NMDG chloride solution. Washed oocytes were  
9 individually lysed in 150  $\mu\text{L}$  2% sodium dodecyl sulfate (SDS). Triplicate 10  $\mu\text{L}$  aliquots of influx bath  
10 solution were used to calculate specific activity of radiolabeled substrate ions. Oocyte ion uptakes  
11 were calculated from cpm values of cold-washed oocytes and from bath specific activity.

12  
13 *Confocal immunofluorescence microscopy:*

14 Oocytes were injected with 50 ng human MYC-tagged OXGR1 cRNA. cRNA-injected oocytes  
15 and uninjected oocytes were incubated 72h at 17.5°C in MBS containing gentamicin (10  $\mu\text{g}/\text{mL}$ ). 10  
16 oocytes in each experimental group were fixed in 3% paraformaldehyde (PFA) in phosphate-buffered  
17 saline (PBS) for 30 min at room temperature, washed 3 times with PBST, permeabilized with 1% SDS  
18 in PBS supplemented with 0.02% Na azide (PBS-azide) for 1 to 2 minutes, and washed again 3 times  
19 with PBST.

20 Fixed, permeabilized oocytes were incubated overnight at 4°C in 0.5 ml PBST containing  
21 affinity-purified polyclonal rabbit anti-Myc Ig (Cell Signaling #71D10) at 1:1000 dilution, rinsed in  
22 PBST, followed by Cy3-conjugated donkey-anti-rabbit secondary Ig (Cell Signaling) for 90 min at  
23 20°C. Stained oocytes were washed 3x in PBST, 2x in PBS-azide and post-fixed in PFA for 10  
24 minutes. Fixed oocytes were washed 2x in PBST, extensively washed with PBS-azide, and stored in



1 PBS-azide at 4°C until imaged. Cy3-labeled oocytes aligned in uniform orientation along a plexiglass  
2 groove were sequentially imaged through the 10x objective of a Zeiss LSM510 laser scanning  
3 confocal microscope, using the 543 nm laser line at 512 x 512 resolution at a uniform setting of 80%  
4 intensity, pinhole 54 (1.0 Airy units), detector gain 650, Amp gain 1, zero amp offset.

5 Polypeptide abundance at or near the oocyte surface was estimated by quantitation of specific  
6 fluorescence intensity (FI) at the circumference of one quadrant of an equatorial focal plane image of  
7 the oocyte (Image J v. 1.38, National Institutes of Health). Background correction was performed by  
8 subtraction from the FI of each cRNA-injected oocyte the mean FI value of a comparable  
9 circumference area from an equatorial plane quadrant of water-injected oocytes.

#### 11 *Oocyte lysate immunoblots:*

12 20 oocytes injected with OXGR1 cRNA (50 ng) were placed in 1.5 mL MBS and incubated 72  
13 h at 17.5°C. MBS was then aspirated and replaced with RIPA buffer containing Complete Protease  
14 inhibitor (6 µl per oocyte), vortexed vigorously and immediately frozen at -80°C for  $\geq 2$  hours. The  
15 subsequently thawed mixture was again vortexed, then centrifuged 20-30 minutes at 4°C at maximal  
16 microfuge speed. The opalescent infranatant separating pellet and the foamy supernatant was  
17 withdrawn and subjected to two more cycles of vortexing, 4°C centrifugation, and infranatant harvest.  
18 The final, clarified protein extracts were assayed for protein content by the BCA method and stored at  
19 -80°C until use. 20 µg of extract protein was brought to 10 µl volume with RIPA buffer containing  
20 protease inhibitors, and 4 µl SDS load buffer containing  $\beta$ -mercaptoethanol was added. The sample  
21 mixture was incubated at room temperature for 30 min, then loaded on an 8-16% polyacrylamide  
22 gradient tris-glycine gel (BIO-RAD) and subjected to SDS-PAGE. Protein was transferred to PVDF  
23 membrane (BioRad TurboBlot), washed in TBST, and blocked 1 hr with TBST plus 5% powdered  
24 milk. The blocked membrane was washed with TBST and incubated overnight at 4°C with affinity

1 purified rabbit polyclonal anti-Myc Ig (Cell Signaling #71D10) diluted 1:500 in TBST/5% BSA, then  
2 further washed and incubated 1 hr with horseradish peroxidase-coupled goat anti-rabbit Ig (Thermo  
3 Scientific #31460) diluted 1:8000 in TBST/5% milk. The peroxidase signal was developed  
4 (Supersignal West DURA kit, Life Technologies), imaged (FluorChem E, Bio-Techne), and  
5 quantitated by densitometry (Image J).

### 6 7 *Statistics:*

8 Data reported as means  $\pm$  SE (ion flux, ion current, fluorescence intensity) were compared by  
9 Student's paired or unpaired two-tailed t tests (Microsoft Excel), or by ANOVA with Tukey post-hoc  
10 analysis (SigmaPlot). P <0.05 was interpreted as statistically significant.

### 11 12 **Statistics**

13 Graphpad Prism 8.0.0 software or SigmaPlot software was used to perform statistical testing.

### 14 15 **Web Resources**

16 UCSC Genome Browser, [genome.ucsc.edu](http://genome.ucsc.edu)

17 Ensembl Genome Browser, [www.ensembl.org](http://www.ensembl.org)

18 ExAC and gnomAD browsers, [gnomad.broadinstitute.org](http://gnomad.broadinstitute.org)

19 Polyphen2, [genetics.bwh.harvard.edu/pph2](http://genetics.bwh.harvard.edu/pph2)

20 Sorting Intolerant From Tolerant (SIFT), [sift.jcvi.org](http://sift.jcvi.org)

21 MutationTaster, [www.mutationtaster.org](http://www.mutationtaster.org)

22 Combined Annotation Dependent Depletion, <https://cadd.gs.washington.edu/>

23 SMART, [smart.embl-heidelberg.de](http://smart.embl-heidelberg.de)

24 Protein Data Bank, [www.rcsb.org](http://www.rcsb.org)

1 GPCR Safari, ebi.ac.uk/chembl/safari/gpcrsafari

## 3 **METHODS REFERENCES**

- 4 1. Connaughton, D. M. *et al.* Monogenic causes of chronic kidney disease in adults. *Kidney*  
5 *International* **95**, 914–928 (2019).
- 6 2. Braun, D. A. *et al.* Mutations in multiple components of the nuclear pore complex cause nephrotic  
7 syndrome. *J Clin Invest* **128**, 4313–4328 (2018).
- 8 3. Seelow, D., Schuelke, M., Hildebrandt, F. & Nürnberg, P. HomozygosityMapper—an interactive  
9 approach to homozygosity mapping. *Nucleic Acids Research* **37**, W593–W599 (2009).
- 10 4. Hildebrandt, F. *et al.* A Systematic Approach to Mapping Recessive Disease Genes in Individuals  
11 from Outbred Populations. *PLoS Genetics* **5**, e1000353 (2009).
- 12 5. Sayer, J. A. *et al.* The centrosomal protein nephrocystin-6 is mutated in Joubert syndrome and  
13 activates transcription factor ATF4. *Nature Genetics* **38**, 674 (2006).
- 14 6. Lek, M. *et al.* Analysis of protein-coding genetic variation in 60,706 humans. *Nature* **536**, 285–291  
15 (2016).
- 16 7. Karczewski, K. J. *et al.* The mutational constraint spectrum quantified from variation in 141,456  
17 humans. *Nature* **581**, 434–443 (2020).
- 18 8. Jumper, J. *et al.* Highly accurate protein structure prediction with AlphaFold. *Nature* **596**, 583–589  
19 (2021).
- 20 9. Ochoa-Montaño, B., Pandurangan, A. P., Blundell, T. L. & Ascher, D. B. SDM: a server for  
21 predicting effects of mutations on protein stability. *Nucleic Acids Research* **45**, W229–W235  
22 (2017).
- 23 10. Park, J. *et al.* Single-cell transcriptomics of the mouse kidney reveals potential cellular targets of  
24 kidney disease. *Science* **360**, 758 (2018).

Supplementary Table 1. Clinical Phenotypes of *OXGR1* variant-associated NL/NC families

| Family_ Individual | NL (Y/N) | Recurrent NL (Y/N) | Stone Composition | NC (Y/N) | Age of Onset (yrs) | NL/NC Fam Hx (Y/N) | Serum Electrolytes<br>Renal Function<br>Blood Gas<br>Endocrine Labs                                                                                                                                                                                                                  | Urinary Studies                                                                                                                                                                                                                                     | Management                  |
|--------------------|----------|--------------------|-------------------|----------|--------------------|--------------------|--------------------------------------------------------------------------------------------------------------------------------------------------------------------------------------------------------------------------------------------------------------------------------------|-----------------------------------------------------------------------------------------------------------------------------------------------------------------------------------------------------------------------------------------------------|-----------------------------|
| Css1201            | Y        | Y                  | CaOx              | N        | 14                 | ND                 | BUN 4.2 mmol/L (NORM)<br>Cr 104 umol/L (NORM)<br>Na 137 mmol/L (NORM)<br>K 4.4 mmol/L (NORM)                                                                                                                                                                                         | Ca 0.19 mmol/mmol Cr (NORM)<br>Na 408 mmol/day (HIGH)                                                                                                                                                                                               | ND                          |
| URO 146_21         | Y        | Y                  | ND                | N        | 65                 | Y                  | ND                                                                                                                                                                                                                                                                                   | ND                                                                                                                                                                                                                                                  | Ureteroscopy for NL removal |
| URO 146_11         | Y        | Y                  | ND                | N        | 27                 | Y                  | ND                                                                                                                                                                                                                                                                                   | ND                                                                                                                                                                                                                                                  | ND                          |
| B1467_22           | Y        | Y                  | CaOx Mono         | Y        | 6                  | Y                  | BUN 21 mg/dL (HIGH)<br>Cr 0.9 mg/dL (HIGH)<br>Na 139 mmol/L (NORM)<br>K 3.5 mmol/L (NORM)<br>HCO3 19 mmol/L (LOW)<br>Ca 8.5 mg/dL (NORM)<br>PO 5.5 mg/dL (NORM)<br>UrAc 6 mg/dL (NORM)<br>Venous pH 7.32 (NORM)<br>Venous pCO2 35 (LOW)                                              | Spec Grav 1.015<br>Urine pH 6.5<br>Urine Ca 1.15 mg/kg/day (NORM)<br>Urine Ox 50 mg/24hr/1.73 (HIGH)<br>Urine Mg 91.8 mg/24hr/1.73 (NORM)<br>Urine Citrate 373 mg/g Cr (LOW)<br>Urine UrAc 506 mg/24hr/1.73 (NORM)<br>Urine Ca-Oxalate Crystalluria | Hydration, Citrate.         |
| B1467_21           | N        | NA                 | NA                | Y        | ND                 | Y                  | BUN 19 mg/dL (HIGH)<br>Cr 0.7 mg/dL (HIGH)<br>Na 136 mEq/L (NORM)<br>K 3.8 mEq/L (NORM)<br>Cl 99 mEq/L (NORM)<br>HCO3 21 mEq/L (NORM)<br>Ca 9.8 mg/dL (NORM)<br>Mg 1.9 mg/dL (NORM)<br>PO 5.4 mg/dL (NORM)<br>UrAc 5.5 mg/dL (NORM)<br>Venous pH 7.32 (NORM)<br>Venous pCO2 38 (LOW) | Spec Grav 1.010<br>Urine pH 6.4<br>Urine Ca 1.2 mg/kg/day (NORM)<br>Urine Ox 65 mg/24hr/1.73 (HIGH)<br>Urine Mg 92 mg/24hr/1.73 (NORM)<br>Urine Citrate 380 mg/g Cr (LOW)<br>Urine UrAc 500 mg/24hr/1.73 (NORM)<br>Urine Ca-Oxalate Crystalluria    | ND                          |
| B1467_23           | N        | NA                 | NA                | Y        | ND                 | Y                  | BUN 10 mg/dL (NORM)<br>Cr 0.6 mg/dL (NORM)<br>Na 138 mEq/L (NORM)<br>K 4 mEq/L (NORM)<br>Cl 100 mEq/L (NORM)<br>HCO3 19 mEq/L (LOW)<br>Ca 10.5 mg/dL (NORM)<br>Mg 2 mg/dL (NORM)<br>PO 5.2 mg/dL (NORM)<br>UrAc 5.4 mg/dL (NORM)<br>Venous pH 7.38 (NORM)<br>Venous pCO2 40 (LOW)    | Spec Grav 1.015<br>Urine pH 6.3<br>Urine Ca 1.15 mg/kg/day (NORM)<br>Urine Ox 60 mg/24hr/1.73 (HIGH)<br>Urine Mg 97 mg/24hr/1.73 (NORM)<br>Urine Citrate 385 mg/g Cr (LOW)<br>Urine UrAc 480 mg/24hr/1.73 (NORM)<br>Urine Ca-Oxalate Crystalluria   | ND                          |
| B1467_24           | N        | NA                 | NA                | Y        | ND                 | Y                  | BUN 12 mg/dL (NORM)<br>Cr 0.5 mg/dL (NORM)<br>Na 138 mEq/L (NORM)<br>K 3.5 mEq/L (NORM)<br>Cl 101 mEq/L (NORM)<br>HCO3 20 mEq/L (NORM)<br>Ca 9.5 mg/dL (NORM)                                                                                                                        | Spec Grav 1.020<br>Urine pH 6.6<br>Urine Ca 1.20 mg/kg/day (NORM)<br>Urine Ox 66 mg/24hr/1.73 (HIGH)<br>Urine Mg 90 mg/24hr/1.73 (NORM)<br>Urine Citrate 388 mg/g Cr (LOW)<br>Urine UrAc 505 mg/24hr/1.73 (NORM)                                    | ND                          |

|             |   |    |                              |   |    |    |                                                                                                                                                                                                                                                                                                                                |                                                                                                                                                                                                            |                                                               |
|-------------|---|----|------------------------------|---|----|----|--------------------------------------------------------------------------------------------------------------------------------------------------------------------------------------------------------------------------------------------------------------------------------------------------------------------------------|------------------------------------------------------------------------------------------------------------------------------------------------------------------------------------------------------------|---------------------------------------------------------------|
|             |   |    |                              |   |    |    | Mg 1.9 mg/dL (NORM)<br>PO 5.2 mg/dL (NORM)<br>UrAc 4.5 mg/dL (NORM)<br>Venous pH 7.32 (NORM)<br>Venous pCO2 35 (LOW)                                                                                                                                                                                                           | Urine Ca-Oxalate Crystalluria                                                                                                                                                                              |                                                               |
| B1467_12    | N | NA | NA                           | Y | ND | Y  | ND                                                                                                                                                                                                                                                                                                                             | ND                                                                                                                                                                                                         | ND                                                            |
| B641_MA1009 | Y | Y  | 51% CaOx Mono<br>45% CaOx Di | N | 16 | ND | BUN 9 mg/dL (NORM)<br>Cr 0.6 mg/dL (NORM)<br>Na 140 mEq/L (NORM)<br>K 4.15 mEq/L (NORM)<br>Cl 102 mEq/L (NORM)<br>HCO3 27 mEq/L (NORM)<br>Ca 10.4 mg/dL (NORM)<br>Mg 2.0 mg/dL (NORM)<br>PO 4.1 mg/dL (NORM)<br>UrAc 3.6 mg/dL (NORM)<br>PTH 14.8 pg/mL (NORM)<br>25-OH VitD 21.5 ng/mL (NORM)<br>1,25-OH VitD 76 pg/mL (NORM) | pH 6.761<br>Ca/24hr 133 mg (NORM)<br>Ca/kg/24hr 2.7 mg/kg (NORM)<br>CaOx SS 9.21 (NORM)<br>CaPh SS 2.57 (HIGH)<br>Ox/24hr 49 (HIGH)<br>Na/24hr 239 (HIGH)<br>UrAc/24hr 0.553 (NORM)<br>UrAc SS 0.19 (NORM) | ESWL,<br>Hydration.                                           |
| JAS-F68_21  | Y | Y  | CaOx                         | Y | 50 | Y  | BUN 5.2 mmol/L (NORM)<br>Cr 81 umol/L (NORM)<br>Na 137 mEq/L (NORM)<br>K 3.93 mEq/L (NORM)<br>Ca 2.36 mg/dL (NORM)<br>Ionized Ca 1.15 mmol/L (LOW)<br>PO 1.11 mmol/L (NORM)                                                                                                                                                    | Ca 0.61 mmol/mmol Cr<br>(NORM, ULN 0.7 mmol/mmol)                                                                                                                                                          | ESWL (twice),<br>PCNL (3<br>times).                           |
| B431_21     | Y | N  | 95% CaOx Mono<br>5% CaPO     | N | 18 | Y  | BUN 8 mg/dL (NORM)<br>Cr 0.5 mg/dL (NORM)<br>Na 137 mEq/L (NORM)<br>K 3.93 mEq/L (NORM)<br>Cl 102 mEq/L (NORM)<br>HCO3 23 mEq/L (NORM)<br>Ca 9.7 mg/dL (NORM)<br>Mg 2.1 mg/dL (NORM)<br>PO 3.4 mg/dL (NORM)<br>UrAc 4.2 mg/dL (NORM)<br>PTH 46.5 pg/mL (NORM)<br>25-OH VitD 11.6 ng/mL (LOW)<br>1,25-OH VitD 74 pg/mL (NORM)   | Spec Grav 1.011<br>pH 6.5<br>Ca 0.14 g/g Cr (NORM)<br>Ox <0.01 g/g Cr (NORM)<br>Mg 0.07 g/g Cr (NORM)<br>Citrate 769 mg/g Cr (NORM)<br>UrAc 0.55 g/g Cr (NORM)<br>No crystalluria                          | Ureteroscopy<br>and Basket<br>Extraction of<br>unilateral NL. |

Abbreviations: 1,25-OH VitD, 1,25-dihydroxy Vitamin D; 24hr, 24 hours; 25-OH VitD, 25-hydroxy Vitamin D; BUN, blood urea nitrogen; Ca, calcium; CaOx, calcium oxalate; CaPO, calcium phosphate; Cl, chloride; Cr, creatinine; Di, dihydrate; ESWL, Extracorporeal Shock Wave Lithotripsy; Fam Hx, family history; HCO3, bicarbonate; K, potassium; Mg, magnesium; Mono, monohydrate; N, no; Na, sodium; NA, not applicable; NC, nephrocalcinosis; ND, no data; NL, nephrolithiasis; NORM, normal; Ox, oxalate; PCNL, Percutaneous Nephrolithotomy; PO, phosphorous; PTH, parathyroid hormone; SS, supersaturation; UrAc, uric acid; Y, yes; yrs, years.

**Supplementary Table S2. Variants of unknown significance in Family B1467**

| Family_Individual                               | Sex                        | Gene Symbol  | Genotype                              | Nucleotide Change | AA Change   | <i>In silico</i> Severity Scores         | Conservation Through   | ExAC; gnomAD (H, h, Tot)   |
|-------------------------------------------------|----------------------------|--------------|---------------------------------------|-------------------|-------------|------------------------------------------|------------------------|----------------------------|
| B1476<br>_21<br>_22<br>_23<br>_24<br>_12<br>_11 | F<br>F<br>M<br>M<br>F<br>M | <i>LMX1B</i> | HET<br>HET<br>HET<br>HET<br>HET<br>WT | c.650G>A          | p.Arg217Gln | SIFT DL<br>MT DC<br>PP2 PSD<br>CADD 26.6 | <i>D. melanogaster</i> | NP<br>0/4/275398           |
| B1476<br>_21<br>_22<br>_23<br>_24<br>_12<br>_11 | F<br>F<br>M<br>M<br>F<br>M | <i>GAS6</i>  | HET<br>HOM<br>HET<br>WT<br>HET<br>HET | c.460G>C          | p.Asp154His | SIFT DL<br>MT DC<br>PP2 PD<br>CADD 23.9  | <i>G. gallus</i>       | 0/29/120644<br>0/85/282404 |

Abbreviations: AA, amino acid; CADD, Combined Annotation Dependent Depletion; DC, disease causing; DL, deleterious; ExAC, Exome Aggregation Consortium; F, female; gnomAD Genome Aggregation database; H, homozygous individuals in database; h, heterozygous alleles of particular variant in database; HET, heterozygous genotype; HOM, homozygous genotype; M, male; NP, not present in variant database; PD, probably disease causing; PP2, PolyPhen-2 prediction score; PSD, possibly disease causing; SIFT, Sorting Tolerant From Intolerant prediction score; Tot, total alleles at position in database; WT, wildtype genotype.

**Supplementary Table S3. Heterozygous variant of unknown significance (VUS) in the gene *OXGR1* (NM\_080818) in 1 family with nephrolithiasis.**

| Family_Individual | Nucleotide Change | AA Change   | <i>In silico</i> Severity Scores | ACMG/AMP Classification (Criteria) | Conser-<br>vation | ExAC;<br>gnomAD<br>(H, h, Tot) | SEX | Country of<br>Origin /<br>Ethnicity | Age of<br>onset<br>(yrs) | Stone<br>Disease |
|-------------------|-------------------|-------------|----------------------------------|------------------------------------|-------------------|--------------------------------|-----|-------------------------------------|--------------------------|------------------|
| B431_21           | c.860C>T          | p.Ser287Phe | PP2 PD<br>SIFT DL<br>CADD 5.6    | VUS<br>(PM2, PP3,<br>BS3)          | <i>D. rerio</i>   | NP<br>NP                       | F   | Bosnia                              | 18                       | CaOx NL          |

Abbreviations: AA, amino acid; CADD, Combined Annotation Dependent Depletion; CaOx, calcium oxalate; DL, deleterious; ExAC, Exome Aggregation Consortium; F, female; gnomAD Genome Aggregation database; H, homozygous individuals in database; h, heterozygous alleles of particular variant in database; het, heterozygous; NL nephrolithiasis; NP, not present in variant database; PD, probably damaging; PP2, PolyPhen-2 prediction score; Seg, segregation; SIFT, Sorting Tolerant From Intolerant prediction score; Tot, total alleles at position in database; VUS, variant of unknown significance; yrs, years.

**Table S4. Deleterious Rare *OXGR1* Variants in ExAC exome database**

| Chromosome | Position | Reference | Alternate | Transcript Consequence | Protein Consequence | SIFT Call | PP                | PHRED | Allele Count | Homozygote Count |
|------------|----------|-----------|-----------|------------------------|---------------------|-----------|-------------------|-------|--------------|------------------|
| 13         | 97640013 | T         | C         | c.1A>G                 | p.Met1?             | DAMAGING  | benign            | 21.8  | 1            | 0                |
| 13         | 97640011 | C         | A         | c.3G>T                 | p.Met1?             | DAMAGING  | benign            | 22.1  | 1            | 0                |
| 13         | 97639985 | T         | A         | c.29A>T                | p.Asn10Ile          | DAMAGING  | possibly_damaging | 22.3  | 1            | 0                |
| 13         | 97639977 | C         | A         | c.37G>T                | p.Asp13Tyr          | DAMAGING  | benign            | 21    | 3            | 0                |
| 13         | 97639963 | A         | T         | c.51T>A                | p.Tyr17Ter          | DAMAGING  | NA                | 28    | 1            | 0                |
| 13         | 97639910 | T         | C         | c.104A>G               | p.Tyr35Cys          | DAMAGING  | probably_damaging | 25.3  | 2            | 0                |
| 13         | 97639845 | T         | C         | c.169A>G               | p.Thr57Ala          | DAMAGING  | benign            | 22.3  | 1            | 0                |
| 13         | 97639841 | T         | C         | c.173A>G               | p.Tyr58Cys          | DAMAGING  | probably_damaging | 24.2  | 1            | 0                |
| 13         | 97639815 | T         | C         | c.199A>G               | p.Ser67Gly          | DAMAGING  | benign            | 20.5  | 1            | 0                |
| 13         | 97639812 | T         | C         | c.202A>G               | p.Ser68Gly          | DAMAGING  | probably_damaging | 25.7  | 1            | 0                |
| 13         | 97639811 | C         | T         | c.203G>A               | p.Ser68Asn          | DAMAGING  | probably_damaging | 25.3  | 1            | 0                |
| 13         | 97639796 | A         | T         | c.218T>A               | p.Leu73Gln          | DAMAGING  | possibly_damaging | 26.3  | 1            | 0                |
| 13         | 97639791 | G         | C         | c.223C>G               | p.Leu75Val          | DAMAGING  | probably_damaging | 23.3  | 2            | 0                |
| 13         | 97639779 | C         | A         | c.235G>T               | p.Asp79Tyr          | DAMAGING  | probably_damaging | 28    | 1            | 0                |
| 13         | 97639779 | C         | T         | c.235G>A               | p.Asp79Asn          | DAMAGING  | probably_damaging | 28.1  | 1            | 0                |
| 13         | 97639755 | G         | C         | c.259C>G               | p.Pro87Ala          | DAMAGING  | probably_damaging | 25.3  | 2            | 0                |
| 13         | 97639754 | G         | T         | c.260C>A               | p.Pro87His          | DAMAGING  | probably_damaging | 26.8  | 2            | 0                |
| 13         | 97639743 | G         | A         | c.271C>T               | p.His91Tyr          | DAMAGING  | benign            | 20.8  | 1            | 0                |
| 13         | 97639742 | T         | C         | c.272A>G               | p.His91Arg          | DAMAGING  | probably_damaging | 24.2  | 1            | 0                |
| 13         | 97639737 | A         | G         | c.277T>C               | p.Tyr93His          | DAMAGING  | probably_damaging | 24.6  | 1            | 0                |
| 13         | 97639735 | A         | T         | c.279T>A               | p.Tyr93Ter          | DAMAGING  | NA                | 23.5  | 1            | 0                |
| 13         | 97639725 | C         | T         | c.289G>A               | p.Glu97Lys          | DAMAGING  | benign            | 20.6  | 4            | 0                |
| 13         | 97639717 | C         | A         | c.297G>T               | p.Trp99Cys          | DAMAGING  | probably_damaging | 31    | 1            | 0                |
| 13         | 97639709 | C         | T         | c.305G>A               | p.Gly102Glu         | DAMAGING  | probably_damaging | 27.4  | 2            | 0                |
| 13         | 97639701 | T         | C         | c.313A>G               | p.Met105Val         | DAMAGING  | benign            | 22.5  | 1            | 0                |
| 13         | 97639700 | A         | G         | c.314T>C               | p.Met105Thr         | DAMAGING  | possibly_damaging | 25.5  | 1            | 0                |
| 13         | 97639685 | C         | T         | c.329G>A               | p.Arg110His         | DAMAGING  | benign            | 21.6  | 1            | 0                |
| 13         | 97639647 | A         | C         | c.367T>G               | p.Phe123Val         | DAMAGING  | probably_damaging | 26.4  | 1            | 0                |
| 13         | 97639643 | A         | C         | c.371T>G               | p.Leu124Arg         | DAMAGING  | probably_damaging | 27.9  | 1            | 0                |
| 13         | 97639640 | G         | A         | c.374C>T               | p.Thr125Ile         | DAMAGING  | probably_damaging | 26    | 2            | 0                |
| 13         | 97639622 | G         | G         | c.392G>C               | p.Arg131Pro         | DAMAGING  | probably_damaging | 29.8  | 1            | 0                |
| 13         | 97639598 | AT        | A         | c.415delA              | p.Met139Ter         | #N/A      | #N/A              | #N/A  | 2            | 0                |
| 13         | 97639595 | C         | T         | c.419G>A               | p.Ser140Asn         | DAMAGING  | benign            | 22.3  | 3            | 0                |
| 13         | 97639554 | A         | C         | c.460T>G               | p.Cys154Gly         | DAMAGING  | probably_damaging | 25.5  | 3            | 0                |
| 13         | 97639529 | A         | G         | c.485T>C               | p.Leu162Pro         | DAMAGING  | probably_damaging | 27.2  | 1            | 0                |
| 13         | 97639511 | A         | G         | c.503T>C               | p.Met168Thr         | DAMAGING  | benign            | 23.3  | 2            | 0                |
| 13         | 97639459 | G         | T         | c.555C>A               | p.Asp185Glu         | DAMAGING  | possibly_damaging | 23.1  | 1            | 0                |
| 13         | 97639457 | A         | G         | c.557T>C               | p.Leu186Pro         | DAMAGING  | probably_damaging | 28.4  | 1            | 0                |
| 13         | 97639443 | C         | A         | c.571G>T               | p.Glu191Ter         | DAMAGING  | NA                | 37    | 1            | 0                |
| 13         | 97639429 | A         | C         | c.585T>G               | p.Ile195Met         | DAMAGING  | possibly_damaging | 23.5  | 1            | 0                |
| 13         | 97639420 | G         | C         | c.594C>G               | p.Tyr198Ter         | DAMAGING  | NA                | 36    | 1            | 0                |
| 13         | 97639408 | CA        | C         | c.605delT              | p.Leu202Ter         | #N/A      | #N/A              | #N/A  | 1            | 0                |
| 13         | 97639341 | G         | C         | c.673C>G               | p.Leu225Val         | DAMAGING  | probably_damaging | 18.95 | 1            | 0                |
| 13         | 97639317 | T         | G         | c.697A>C               | p.Ser233Arg         | DAMAGING  | benign            | 21.5  | 3            | 0                |
| 13         | 97639292 | C         | T         | c.722G>A               | p.Arg241Lys         | DAMAGING  | probably_damaging | 22.8  | 1            | 0                |
| 13         | 97639259 | A         | T         | c.755T>A               | p.Val252Glu         | DAMAGING  | possibly_damaging | 23.7  | 1            | 0                |
| 13         | 97639259 | A         | C         | c.755T>G               | p.Val252Gly         | DAMAGING  | possibly_damaging | 23.4  | 1            | 0                |
| 13         | 97639256 | C         | T         | c.758G>A               | p.Cys253Tyr         | DAMAGING  | probably_damaging | 26.3  | 1            | 0                |
| 13         | 97639248 | G         | A         | c.766C>T               | p.Pro256Ser         | DAMAGING  | probably_damaging | 25.1  | 1            | 0                |
| 13         | 97639224 | G         | A         | c.790C>T               | p.Arg264Trp         | DAMAGING  | possibly_damaging | 24    | 2            | 0                |
| 13         | 97639223 | C         | T         | c.791G>A               | p.Arg264Gln         | DAMAGING  | possibly_damaging | 24.6  | 1            | 0                |
| 13         | 97639218 | C         | T         | c.796G>A               | p.Glu266Lys         | DAMAGING  | probably_damaging | 26.2  | 4            | 0                |
| 13         | 97639212 | G         | A         | c.802C>T               | p.Arg268Cys         | DAMAGING  | probably_damaging | 31    | 1            | 0                |
| 13         | 97639211 | C         | T         | c.803G>A               | p.Arg268His         | DAMAGING  | probably_damaging | 25.2  | 3            | 0                |
| 13         | 97639197 | T         | C         | c.817A>G               | p.Ser273Gly         | DAMAGING  | possibly_damaging | 21.8  | 1            | 0                |
| 13         | 97639196 | C         | A         | c.818G>T               | p.Ser273Ile         | DAMAGING  | possibly_damaging | 23.4  | 1            | 0                |
| 13         | 97639194 | A         | G         | c.820T>C               | p.Cys274Arg         | DAMAGING  | probably_damaging | 24    | 1            | 0                |
| 13         | 97639193 | C         | A         | c.821G>T               | p.Cys274Phe         | DAMAGING  | probably_damaging | 25    | 2            | 0                |
| 13         | 97639163 | T         | C         | c.851A>G               | p.Tyr284Cys         | DAMAGING  | probably_damaging | 26.6  | 4            | 0                |
| 13         | 97639160 | A         | T         | c.854T>A               | p.Ile285Asn         | TOLERATED | probably_damaging | 26.9  | 1            | 0                |
| 13         | 97639148 | G         | C         | c.866C>G               | p.Pro289Arg         | DAMAGING  | probably_damaging | 25    | 1            | 0                |
| 13         | 97639139 | G         | A         | c.875C>T               | p.Ala292Val         | DAMAGING  | benign            | 23.1  | 1            | 0                |
| 13         | 97639122 | T         | C         | c.892A>G               | p.Asn298Asp         | DAMAGING  | probably_damaging | 26.2  | 1            | 0                |
| 13         | 97639120 | G         | T         | c.894C>A               | p.Asn298Lys         | DAMAGING  | probably_damaging | 24.3  | 3            | 0                |
| 13         | 97639115 | A         | G         | c.899T>C               | p.Leu300Ser         | DAMAGING  | probably_damaging | 22.4  | 1            | 0                |
| 13         | 97639081 | C         | A         | c.933G>T               | p.Gln311His         | DAMAGING  | benign            | 21.3  | 3            | 0                |



**Supplementary Table S5. Summary of Urinary Risk Factors in *OXGR1* variant-associated individuals**

| <b>Urinary Risk Factors</b> | <b>Frequency in <i>OXGR1</i> variant-associated families</b> | <b>Frequency in <i>OXGR1</i> variant-associated individuals</b> |
|-----------------------------|--------------------------------------------------------------|-----------------------------------------------------------------|
| Hyperoxaluria               | 2/3 families                                                 | 5/6                                                             |
| Hypocitraturia              | 1/2 families                                                 | 4/5                                                             |
| Hypercalciuria              | 0/5 families                                                 | 0/8                                                             |

\*Denominator is families or subjects where measured and data available

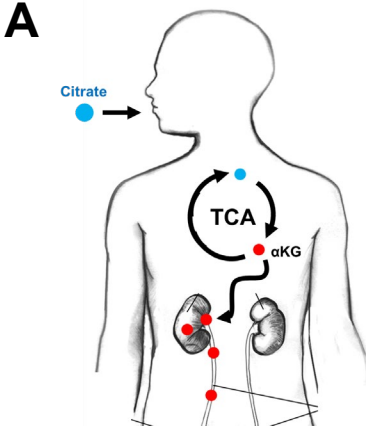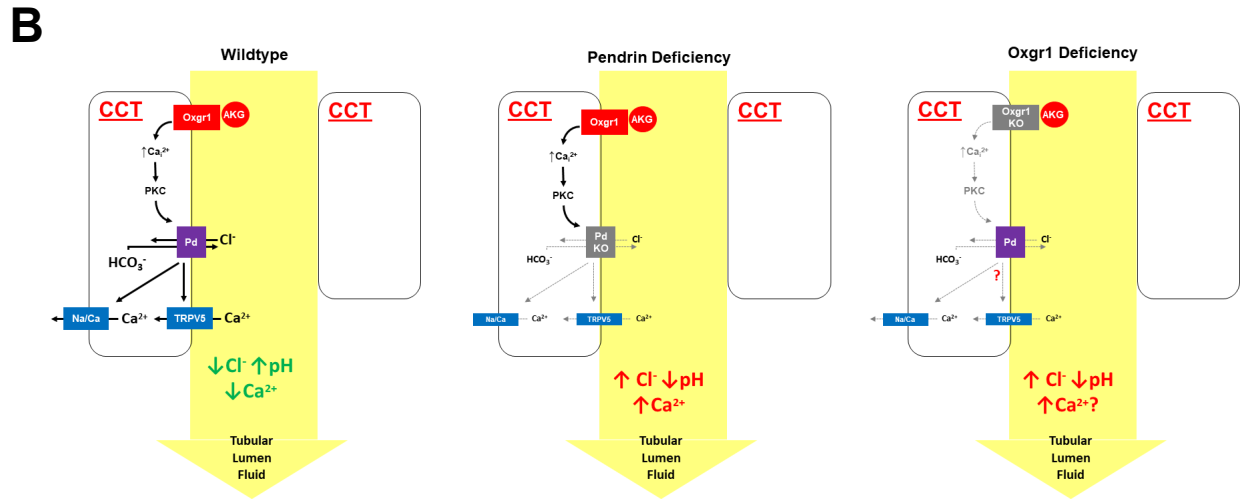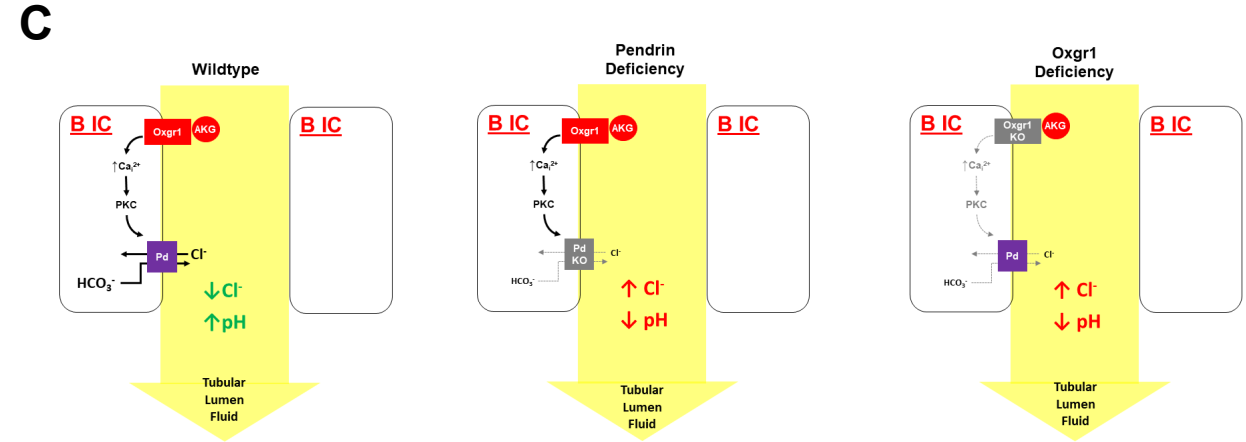

## Supplementary Figure 1. Mechanisms of OXGR1 signaling in renal epithelium.

(A) Citrate is metabolized into alpha-ketoglutarate (AKG) through the tri-carboxylic acid cycle (TCA) and excreted into the urine.

(B) Within the wildtype nephron in mice (left panel), *Oxgr1* is expressed in cortical connecting tubule cells with Pendrin. Filtered AKG stimulates *Oxgr1* activity that, through increased  $\text{Ca}^{2+}$  levels and Protein Kinase C (PKC), promotes Pendrin (Pd) activity. This leads to increased bicarbonate secretion into and chloride reabsorption from the tubular fluid. Pendrin also positively regulates the expression of apical  $\text{Ca}^{2+}$  channel TRPV5 and basolateral sodium-calcium exchanger (NCX1) to mediate transepithelial calcium transport. In Pendrin KO mice (middle panel), Pendrin deficiency is associated with impaired urine alkalinization and increase chloride secretion in addition to calcium wasting associated with reduced expression of calcium transporters. *Oxgr1* deficiency (right panel) phenocopies the effects of Pendrin deficiency on bicarbonate and chloride handling. It remains unknown if *Oxgr1* deficiency similarly impairs calcium reabsorption.

(C) Within the wildtype nephron in mice (left panel), *Oxgr1* is expressed in Type B intercalated cells with Pendrin. Filtered AKG stimulates *Oxgr1* activity that, through increased  $\text{Ca}^{2+}$  levels and Protein Kinase C (PKC), promotes Pendrin (Pd) activity. This leads to increased bicarbonate secretion into and chloride reabsorption from the tubular fluid. In Pendrin KO mice (middle panel), Pendrin deficiency is associated with impaired urine alkalinization and increase chloride secretion. *Oxgr1* deficiency (right panel) phenocopies the effects of Pendrin deficiency on bicarbonate and chloride handling.

# Autosomes

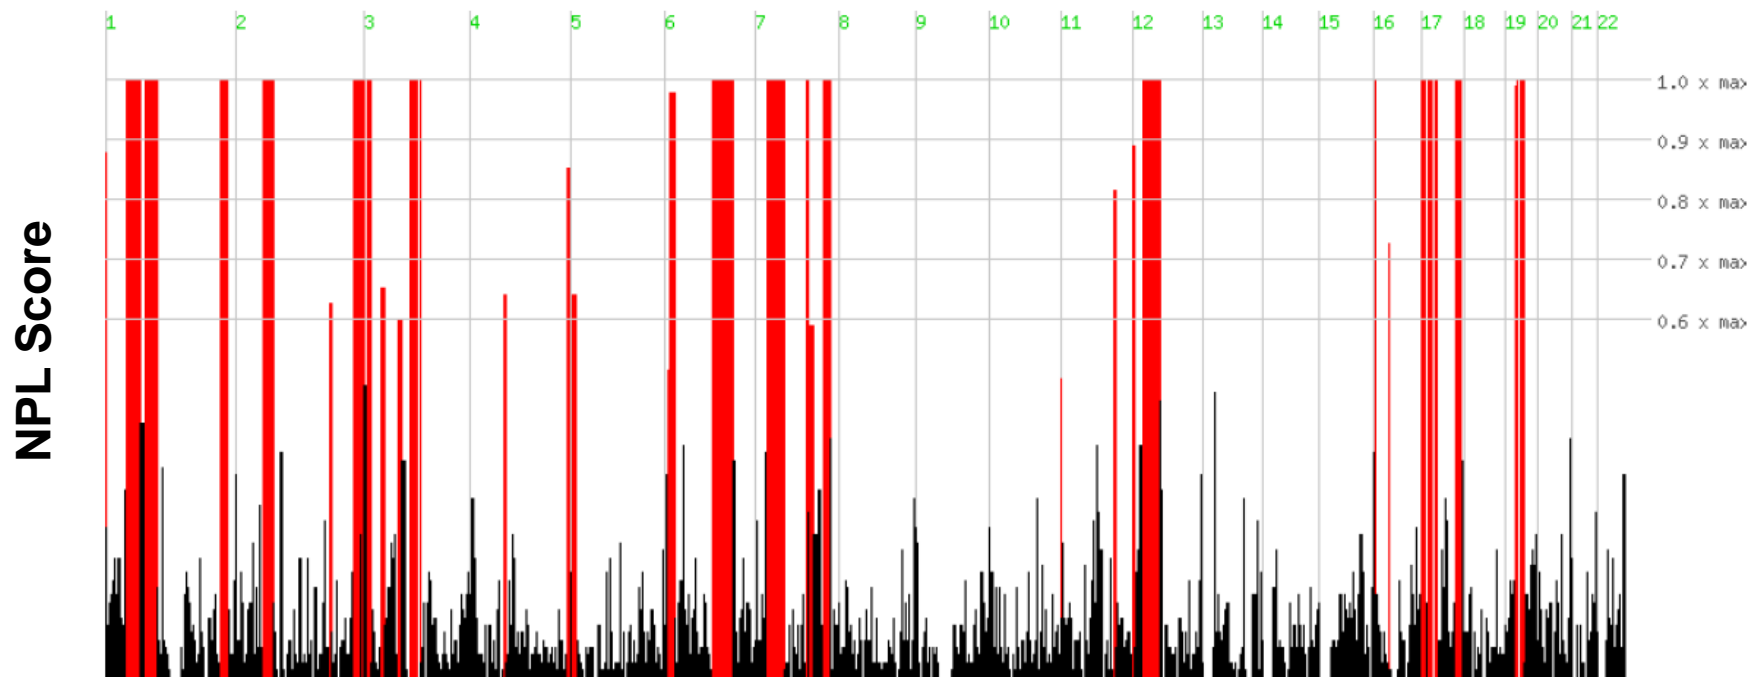

**Figure S2. Homozygosity Mapping based on exome variants for B1467\_22**

Homozygosity mapping was performed by mapping profiles of nonparametric lod (NPL) scores across the genome based on WES variant data using Homozygosity Mapper.

**A.**

**URO146**

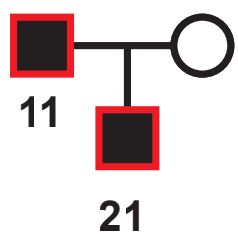

**B1467**

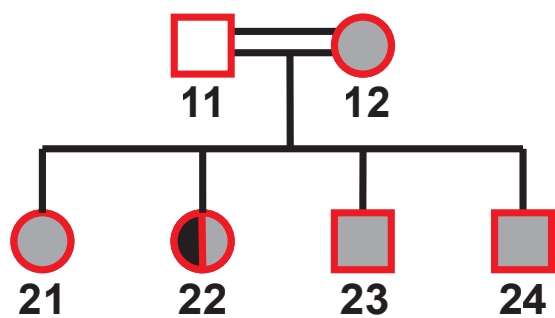

**B641\_MA1009**

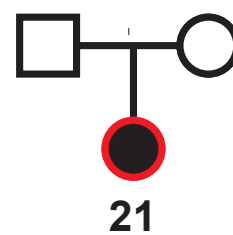

**JAS-F68**

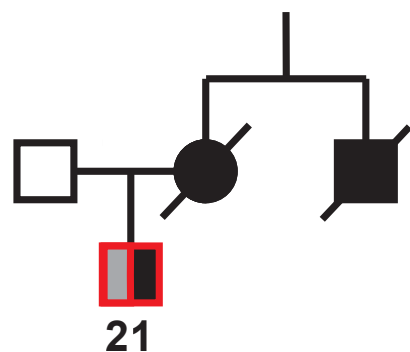

**B431**

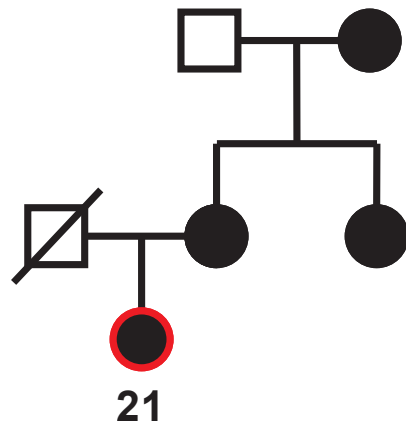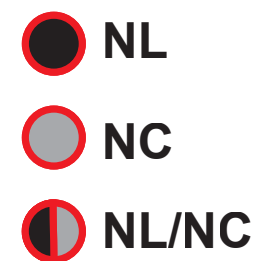

**B.**

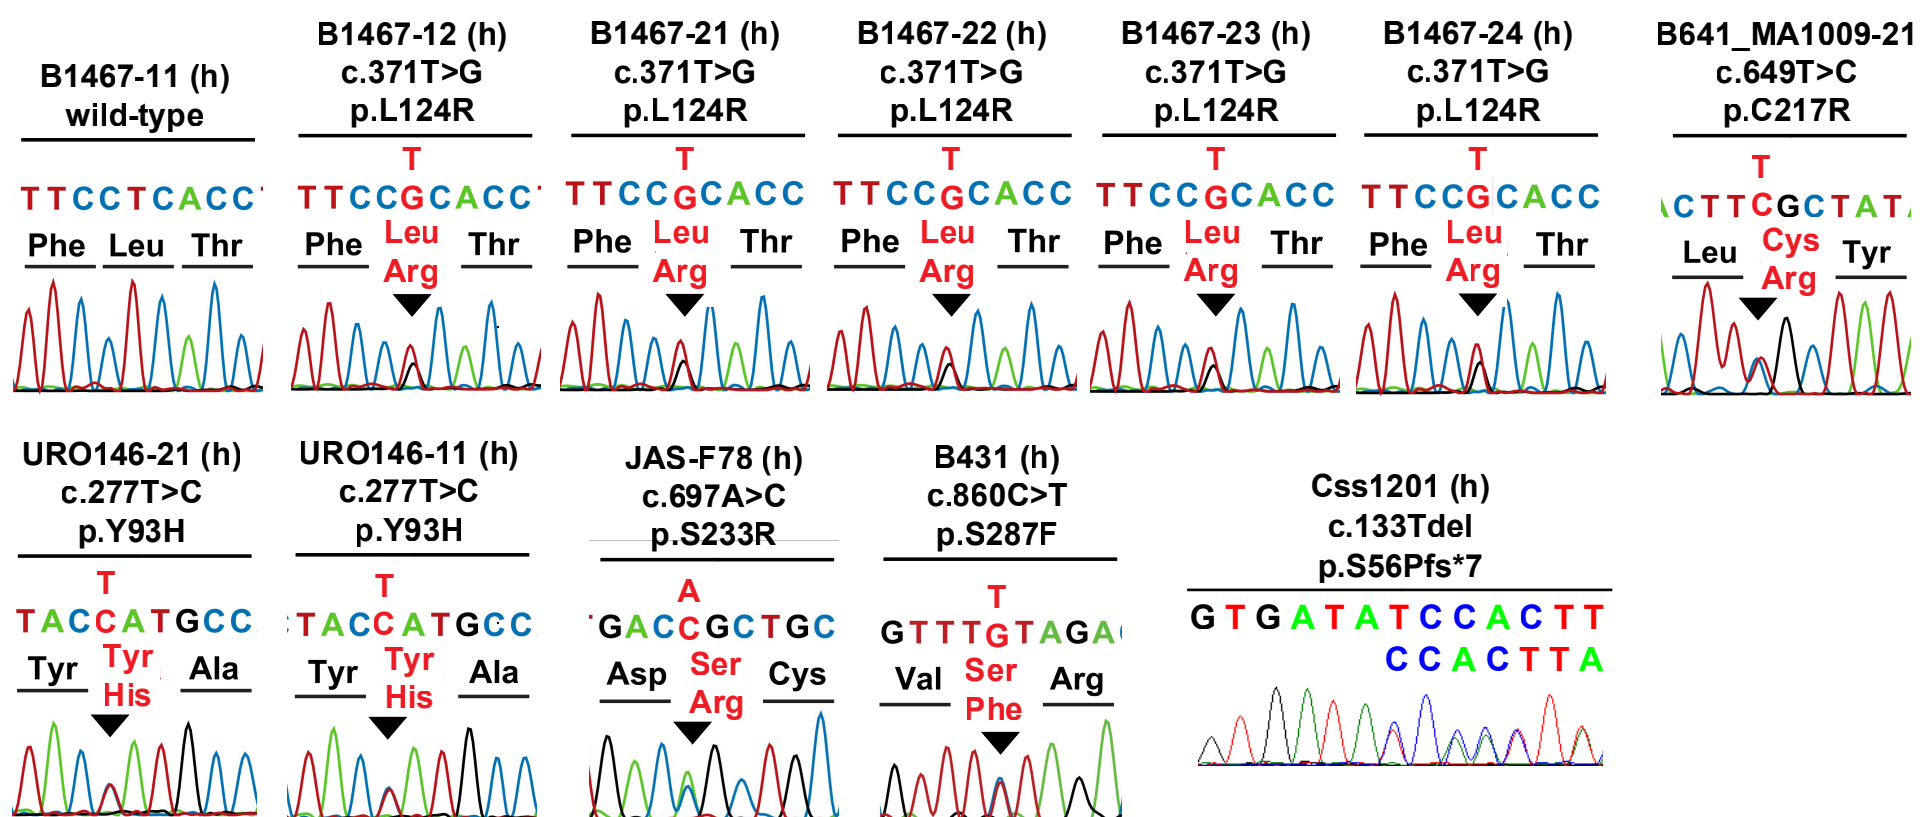

**Supplementary Figure 3. Pedigree structures and Sanger sequencing of *OXGR1* variants in families with nephrolithiasis and/or nephrocalcinosis.**

(A) Pedigree structures of families with *OXGR1* variants associated with nephrolithiasis (NL) and/or nephrocalcinosis (NC). A legend at the bottom right defines the phenotype associated with each shading. Subjects for whom DNA was available are circled in red.

(B) Sanger sequencing of *OXGR1* variants in families with NL and/or NC are shown.

A

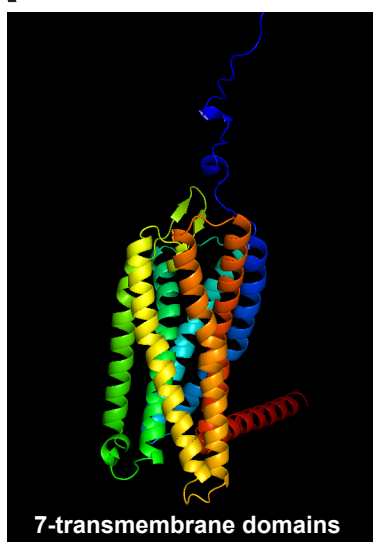

B

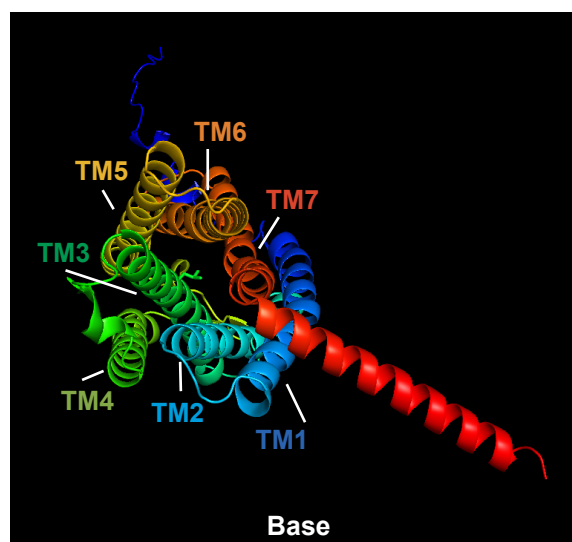

C

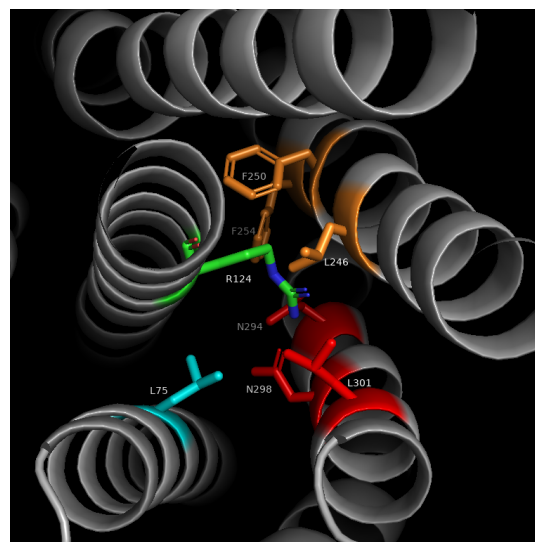

D

|                      |     | OXGR1 Transmembrane Domain 3 Amino Acid Sequence |     |     |     |     |     |     |     |     |     |     |     |     |     |     |     |     |     |     |     |     |     |     |     |     |     |     |     |     |     |
|----------------------|-----|--------------------------------------------------|-----|-----|-----|-----|-----|-----|-----|-----|-----|-----|-----|-----|-----|-----|-----|-----|-----|-----|-----|-----|-----|-----|-----|-----|-----|-----|-----|-----|-----|
|                      |     | D                                                | F   | M   | C   | K   | F   | I   | R   | F   | S   | F   | H   | F   | N   | L   | Y   | S   | S   | I   | L   | F   | L   | T   | C   | F   | S   | I   | F   | R   | Y   |
| Amino Acid Frequency | H   | 14                                               | 9   | 5   | 1   | 6   | 0   | 11  | 11  | 1   | 0   | 7   | 10  | 1   | 2   | 0   | 11  | 3   | 1   | 0   | 1   | 21  | 1   | 0   | 1   | 0   | 1   | 0   | 9   | 3   | 12  |
|                      | K   | 13                                               | 3   | 0   | 0   | 106 | 0   | 2   | 6   | 0   | 0   | 6   | 7   | 0   | 1   | 2   | 0   | 0   | 0   | 0   | 1   | 1   | 0   | 0   | 0   | 0   | 0   | 0   | 3   | 0   |     |
|                      | R   | 22                                               | 6   | 1   | 4   | 56  | 0   | 12  | 15  | 0   | 0   | 5   | 3   | 0   | 0   | 11  | 1   | 0   | 0   | 0   | 0   | 0   | 0   | 0   | 0   | 0   | 0   | 1   | 282 | 2   |     |
|                      | D   | 44                                               | 1   | 0   | 6   | 19  | 0   | 1   | 5   | 1   | 0   | 58  | 8   | 0   | 0   | 0   | 0   | 0   | 1   | 0   | 0   | 0   | 0   | 0   | 0   | 0   | 0   | 0   | 192 | 0   | 0   |
|                      | E   | 25                                               | 7   | 0   | 0   | 8   | 0   | 5   | 8   | 0   | 0   | 4   | 8   | 2   | 0   | 0   | 10  | 2   | 5   | 0   | 3   | 0   | 0   | 0   | 1   | 0   | 0   | 0   | 64  | 0   | 0   |
|                      | N   | 15                                               | 3   | 0   | 0   | 14  | 0   | 4   | 14  | 0   | 0   | 1   | 3   | 1   | 77  | 2   | 8   | 2   | 0   | 4   | 4   | 28  | 1   | 1   | 0   | 0   | 3   | 0   | 9   | 0   | 0   |
|                      | Q   | 14                                               | 1   | 3   | 1   | 16  | 0   | 5   | 8   | 0   | 1   | 25  | 5   | 0   | 1   | 5   | 7   | 0   | 1   | 0   | 1   | 1   | 0   | 0   | 0   | 0   | 1   | 6   | 6   | 1   |     |
|                      | S   | 27                                               | 9   | 9   | 4   | 9   | 5   | 26  | 31  | 36  | 10  | 8   | 21  | 12  | 63  | 26  | 23  | 48  | 215 | 7   | 15  | 47  | 1   | 18  | 9   | 0   | 167 | 3   | 1   | 0   | 5   |
|                      | T   | 21                                               | 20  | 10  | 1   | 14  | 13  | 19  | 34  | 14  | 12  | 10  | 29  | 28  | 15  | 16  | 41  | 28  | 21  | 21  | 2   | 42  | 6   | 90  | 7   | 4   | 27  | 8   | 5   | 1   | 0   |
|                      | A   | 20                                               | 43  | 23  | 0   | 6   | 28  | 12  | 29  | 40  | 16  | 9   | 14  | 21  | 25  | 7   | 10  | 112 | 10  | 17  | 14  | 4   | 3   | 45  | 107 | 4   | 89  | 19  | 2   | 0   | 2   |
|                      | F   | 5                                                | 38  | 28  | 0   | 1   | 43  | 26  | 9   | 73  | 35  | 43  | 31  | 36  | 31  | 27  | 50  | 0   | 0   | 2   | 86  | 63  | 3   | 8   | 17  | 3   | 0   | 17  | 5   | 1   | 30  |
|                      | I   | 3                                                | 19  | 21  | 0   | 2   | 42  | 25  | 13  | 7   | 40  | 18  | 14  | 27  | 1   | 13  | 11  | 12  | 0   | 117 | 10  | 14  | 30  | 7   | 12  | 168 | 0   | 65  | 0   | 0   | 0   |
|                      | L   | 8                                                | 41  | 93  | 0   | 13  | 87  | 36  | 31  | 18  | 111 | 25  | 21  | 64  | 21  | 42  | 28  | 10  | 1   | 34  | 89  | 55  | 216 | 39  | 41  | 52  | 1   | 68  | 0   | 1   | 1   |
|                      | M   | 1                                                | 1   | 29  | 0   | 1   | 8   | 7   | 7   | 4   | 17  | 21  | 6   | 27  | 4   | 54  | 1   | 2   | 0   | 17  | 11  | 12  | 14  | 6   | 3   | 40  | 0   | 2   | 0   | 0   | 2   |
|                      | V   | 8                                                | 42  | 15  | 1   | 5   | 63  | 59  | 14  | 18  | 41  | 18  | 46  | 56  | 5   | 31  | 6   | 43  | 0   | 74  | 8   | 3   | 19  | 25  | 44  | 29  | 1   | 101 | 2   | 0   | 2   |
|                      | W   | 3                                                | 4   | 5   | 0   | 1   | 2   | 25  | 0   | 2   | 0   | 1   | 2   | 1   | 1   | 1   | 0   | 0   | 0   | 0   | 10  | 0   | 0   | 0   | 2   | 0   | 0   | 3   | 0   | 0   | 11  |
|                      | Y   | 7                                                | 9   | 4   | 1   | 3   | 3   | 15  | 8   | 39  | 1   | 24  | 48  | 6   | 2   | 13  | 80  | 0   | 0   | 0   | 23  | 0   | 1   | 0   | 1   | 0   | 0   | 8   | 0   | 1   | 197 |
|                      | C   | 2                                                | 0   | 1   | 265 | 1   | 1   | 6   | 0   | 10  | 8   | 2   | 7   | 12  | 24  | 31  | 1   | 15  | 5   | 4   | 14  | 7   | 0   | 48  | 47  | 0   | 5   | 1   | 0   | 2   | 34  |
|                      | G   | 15                                               | 17  | 33  | 1   | 2   | 4   | 1   | 40  | 31  | 4   | 11  | 15  | 6   | 22  | 17  | 11  | 23  | 36  | 3   | 8   | 2   | 4   | 10  | 7   | 0   | 5   | 3   | 4   | 0   | 1   |
|                      | P   | 15                                               | 11  | 6   | 2   | 5   | 0   | 1   | 15  | 4   | 2   | 4   | 2   | 0   | 5   | 2   | 1   | 0   | 4   | 0   | 0   | 0   | 1   | 3   | 1   | 0   | 0   | 0   | 0   | 0   | 0   |
| Blank                | 18  | 16                                               | 14  | 13  | 12  | 1   | 2   | 2   | 2   | 2   | 0   | 0   | 0   | 0   | 0   | 0   | 0   | 0   | 0   | 0   | 0   | 0   | 0   | 0   | 0   | 1   | 1   | 0   | 0   | 0   |     |
| Total                | 300 | 300                                              | 300 | 300 | 300 | 300 | 300 | 300 | 300 | 300 | 300 | 300 | 300 | 300 | 300 | 300 | 300 | 300 | 300 | 300 | 300 | 300 | 300 | 300 | 300 | 300 | 300 | 300 | 300 | 300 |     |

L124R

E

|     |     |     |     |     |     |     |     |     |     |     |    |    |    |    |    |     |     |    |     |     |    |    |     |     |     |    |     |     |     |     |     |     |    |     |     |     |     |    |     |     |    |    |     |    |    |     |     |     |     |
|-----|-----|-----|-----|-----|-----|-----|-----|-----|-----|-----|----|----|----|----|----|-----|-----|----|-----|-----|----|----|-----|-----|-----|----|-----|-----|-----|-----|-----|-----|----|-----|-----|-----|-----|----|-----|-----|----|----|-----|----|----|-----|-----|-----|-----|
| M   | N   | E   | P   | L   | D   | Y   | L   | A   | N   | A   | S  | D  | F  | P  | D  | Y   | A   | A  | F   | G   | N  | C  | T   | D   | E   | N  | I   | P   | L   | K   | M   | H   | Y  | L   | P   | V   | I   | Y  | G   | I   | I  | F  | L   | V  | G  | F   | P   | G   |     |
| 12  | 0   | 0   | 1   | 0   | 2   | 0   | 0   | 0   | 8   | 0   | 5  | 0  | 0  | 7  | 0  | 0   | 5   | 5  | 0   | 1   | 1  | 3  | 63  | 1   | 10  | 3  | 10  | 5   | 26  | 28  | 16  | 5   | 6  | 5   | 75  | 65  | 61  | 32 | 109 | 41  | 40 | 84 | 105 | 96 | 98 | 164 | 21  | 27  | 206 |
| N   | A   | V   | V   | I   | S   | T   | Y   | I   | F   | K   | M  | R  | P  | W  | K  | S   | S   | T  | I   | I   | M  | L  | N   | L   | A   | C  | T   | D   | L   | L   | Y   | L   | T  | S   | L   | P   | F   | L  | I   | H   | Y  | Y  | A   | S  | G  | E   | N   | W   | I   |
| 294 | 45  | 34  | 196 | 78  | 6   | 20  | 5   | 22  | 28  | 8   | 18 | 68 | 11 | 12 | 29 | 58  | 28  | 24 | 73  | 11  | 23 | 96 | 152 | 272 | 220 | 19 | 28  | 276 | 174 | 189 | 19  | 57  | 14 | 29  | 115 | 204 | 106 | 20 | 59  | 13  | 50 | 71 | 50  | 18 | 35 | 13  | 15  | 218 | 21  |
| F   | G   | D   | F   | M   | C   | K   | F   | I   | R   | F   | S  | F  | H  | F  | N  | L   | Y   | S  | S   | I   | L  | F  | L   | T   | C   | F  | S   | I   | F   | R   | Y   | C   | V  | I   | I   | H   | P   | M  | S   | C   | F  | S  | I   | H  | K  | T   | R   | C   | A   |
| 140 | 183 | 44  | 38  | 29  | 265 | 106 | 43  | 25  | 15  | 73  | 10 | 43 | 10 | 36 | 77 | 42  | 80  | 48 | 215 | 117 | 89 | 63 | 216 | 90  | 47  | 3  | 167 | 65  | 5   | 282 | 197 | 7   | 20 | 138 | 13  | 95  | 204 | 22 | 22  | 5   | 8  | 5  | 20  | 3  | 17 | 16  | 81  | 11  | 154 |
| V   | V   | A   | C   | A   | V   | V   | W   | I   | I   | S   | L  | V  | A  | V  | I  | P   | M   | T  | F   | L   | I  | T  | S   | T   | N   | R  | T   | N   | R   | S   | A   | C   | L  | D   | L   | T   | S   | S  | D   | E   | L  | N  | T   | I  | K  | W   | Y   | N   | L   |
| 29  | 58  | 34  | 59  | 70  | 37  | 91  | 287 | 40  | 33  | 118 | 89 | 41 | 32 | 12 | 45 | 180 | 10  | 11 | 40  | 30  | 6  | 26 | 17  | 16  | 9   | 10 | 8   | 17  | 18  | 20  | 25  | 247 | 23 | 17  | 32  | 11  | 34  | 12 | 12  | 25  | 34 | 8  | 7   | 4  | 21 | 7   | 97  | 15  | 70  |
| I   | L   | T   | A   | T   | T   | F   | C   | L   | P   | L   | V  | I  | V  | T  | L  | C   | Y   | T  | T   | I   | I  | H  | T   | L   | T   | H  | G   | L   | Q   | T   | D   | S   | C  | L   | K   | Q   | K   | A  | R   | R   | L  | T  | I   | L  | L  | L   | L   | A   | F   |
| 28  | 64  | 28  | 22  | 18  | 14  | 201 | 12  | 100 | 221 | 135 | 36 | 95 | 27 | 25 | 43 | 122 | 221 | 31 | 6   | 168 | 45 | 12 | 46  | 144 | 7   | 9  | 9   | 17  | 21  | 9   | 5   | 20  | 6  | 7   | 34  | 16  | 128 | 95 | 2   | 86  | 53 | 11 | 22  | 38 | 45 | 68  | 68  | 61  | 239 |
| Y   | V   | C   | F   | L   | P   | F   | H   | I   | L   | R   | V  | I  | R  | I  | E  | S   | R   | L  | L   | S   | I  | S  | C   | S   | I   | E  | N   | Q   | I   | H   | E   | A   | Y  | I   | V   | S   | R   | P  | L   | A   | A  | L  | N   | T  | F  | G   | N   | L   | L   |
| 5   | 80  | 209 | 47  | 111 | 290 | 89  | 78  | 86  | 52  | 11  | 1  | 4  | 20 | 14 | 2  | 24  | 25  | 33 | 9   | 6   | 2  | 20 | 62  | 13  | 6   | 24 | 15  | 8   | 24  | 13  | 11  | 57  | 46 | 20  | 75  | 45  | 19  | 6  | 188 | 115 | 16 | 79 | 196 | 19 | 9  | 1   | 213 | 2   | 61  |
| L   | Y   | V   | V   | V   | S   | D   | N   | F   | Q   | Q   | A  | V  | C  | S  | T  | V   | R   | C  | K   | V   | S  | G  | N   | L   | E   | Q  | A   | K   | K   | I   | S   | Y   | S  | N   | N   | P   |     |    |     |     |    |    |     |    |    |     |     |     |     |
| 101 | 266 | 27  | 10  | 46  | 71  | 14  | 39  | 194 | 41  | 22  | 62 | 23 | 9  | 26 | 13 | 21  | 36  | 65 | 16  | 10  | 21 | 13 | 6   | 12  | 6   | 2  | 6   | 10  | 5   | 2   | 2   | 1   | 3  | 2   | 3   | 6   |     |    |     |     |    |    |     |    |    |     |     |     |     |

**Supplementary Figure 4. Structural modeling and paralog analysis of amino acids impacted by *OXGR1* variants.**

- (A) Ribbon structure of human *OXGR1* receptor portrayed from side of seven transmembrane (TM) domains.
- (B) Predicted human *OXGR1* structure shown as in (A) from base.
- (C) The L124R variant is modeled on the predicted human *OXGR1* receptor structure and results in a larger polar arginine residue protruding into this pocket.
- (D) Multiple sequence alignment (MSA) of the primary amino acid sequences of *OXGR1* and 300 additional G-protein coupled receptors (GPCRs) obtained from GPCR Sarfari (ChEMBL). The conservation of amino acids is shown via a frequency table, where the primary amino acid sequence of TM3 of *OXGR1* is shown in the first row. The absolute frequency of amino acids aligned with each *OXGR1* amino acid in the MSA is shown below. Leucine 124 (black arrow) is conserved in 216 of 300 GPCRs (72%), while arginine, predicted to result from case variant c.371T>G, is not observed in any GPCRs at this position. Red shading indicates conservation in >2/3 of GPCRs. Orange highlighting indicates conservation across 1/3 to 2/3 of GPCRs.
- (E) Frequency diagram shows the conservation of each amino acid in *OXGR1* across 300 other GPCRs by MSA. Colored bars represent transmembrane domains. Leucine 124, predicted to be mutated by patient variant c.371T>G, is conserved in 216 of 300 GPCRs (72%). Cysteine 217, predicted to be mutated by patient variant c.649T>C, is conserved in 122 of 300 GPCRs. No other amino acids, predicted to be mutated by *OXGR1* case variants, are conserved in more than 1/3 of GPCRs.

A.

**OXGR1 sequencing in NL/NC cases**

- ES in 133 cases.
- Targeted gene sequencing in 975 cases.

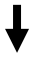

**Rare Variant Analysis**

- Allele frequency less than 1% in dbSNP.
- Allele count < 5 in ExAC database and <10 in gnomAD database.
- Variant deleterious if causes protein truncation OR if causes severe missense variant based on 2 of 3 severe *in silico* prediction scores (Deleterious SIFT score, Probably Damaging PolyPhen 2.0 Score, CADD PHRED  $\geq$  20).

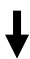

**OXGR1 variants in NL/NC cohort**

- In total, 6 dominant variants identified in 6 families of 1108 NL/NC families (0.54%) (Tables 1 and S2).
- No causative variants were identified in 4 subjects by ES and 1 by panel sequencing for 30 known NL/NC genes. 1 (B641\_MA1009) failed ES for technical reasons.

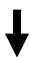

**Functional Evaluation of OXGR1 Missense Variants**

5/6 OXGR1 variants affect OXGR1-mediated Ca<sup>2+</sup> uptake in response to KG at pH5 and/or pH 7.4.

B.

**OXGR1 variant analysis in ES data from 60,706 subjects from ExAC database**

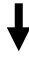

**Rare Variant Analysis**

- Criteria as in (A) applied to ExAC control cohort.

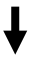

**OXGR1 variants in ExAC control cohort**

- 66 variants in 99 subjects identified out of 60,706 ExAC subjects (0.16%).
- ~1.8 subjects with rare deleterious OXGR1 variant for every 1108 subjects.
- Rare deleterious OXGR1 variants enriched in NL/NC cohort ( $X^2=7.117$ ,  $p=0.0076$ ).



**Supplementary Figure 5. Sequencing and variant interpretation for *OXGR1* locus in 1108 subjects with nephrolithiasis (NL) and/or nephrocalcinosis (NC) and in the ExAC cohort.**

- (A) DNA samples from 133 NL/NC subjects were evaluated by exome sequencing (ES), and 975 NL/NC subjects were evaluated by targeted amplification of the *OXGR1* locus. Variants were filtered, yielding 5 additional variants in 5 families with NL/NC. These subjects were also evaluated for variants in known NL/NC disease genes as shown. All missense variants were functionally assessed for impact on alpha-ketoglutarate (KG)-dependent Ca<sup>2+</sup> influx in *Xenopus* oocytes, demonstrating a functional alteration in 5 of 6 variants.
- (B) ES data from 60,706 ExAC database subjects was interrogated for *OXGR1* variants as described in (A). 66 variants in 99 subjects were identified (0.16%). Assuming no subjects have multiple rare variants, this equates to ~1.8 subjects with an *OXGR1* variant per 1108 subjects. Rare deleterious *OXGR1* variants are enriched in the NL/NC cohort ( $X^2=7.117$ ,  $p=0.0076$ ).

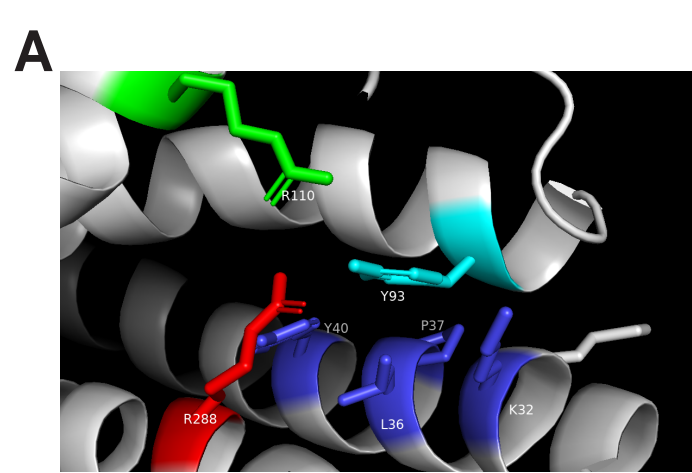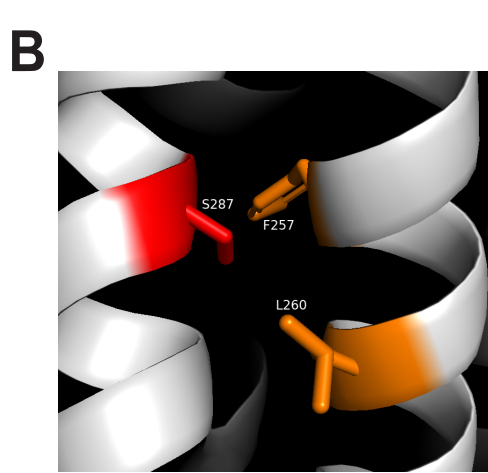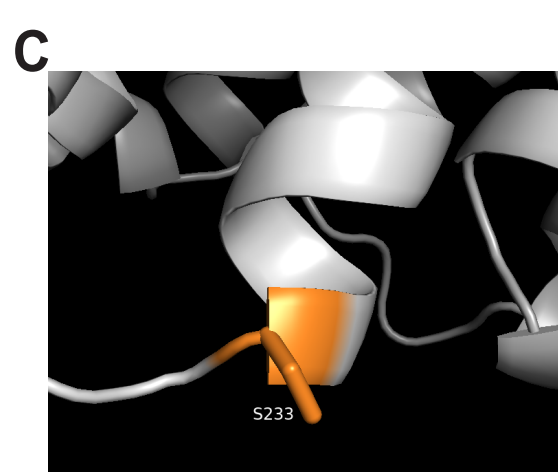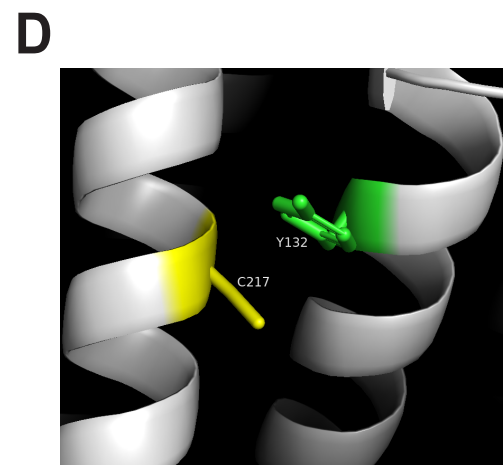

**E**

| OXGR1 Variant | Site Directed Mutator Predicted pseudo $\Delta\Delta G$ Using OXGR1 structure AF-Q96P68-F1 | Stability Outcome   |
|---------------|--------------------------------------------------------------------------------------------|---------------------|
| L124R         | -2.7                                                                                       | Reduced Stability   |
| Y93H          | -1.42                                                                                      | Reduced Stability   |
| C217R         | -0.73                                                                                      | Reduced Stability   |
| S233R         | 1.07                                                                                       | Increased Stability |
| S287F         | 0.44                                                                                       | Increased Stability |

**Supplementary Figure 6. Structural modeling and analysis of NL/NC-associated OXGR1 variants.**

- (A) Position of Y93 and adjacent amino acid residues is portrayed on human OXGR1 (AF-Q96P68-F1-model\_v2). It is within 4 angstroms of six other residues, four of which are also polar.
- (B) S287 is shown and is within 4 angstroms of other polar amino acid residues.
- (C) S233 is shown and is not within 4 angstroms of other polar amino acid residues.
- (D) C217 is shown and is not within 4 angstroms of other cysteine residues.
- (E) Site Directed Mutator was employed to predict thermodynamic instability caused by *OXGR1* NL/NC-associated variant using the human OXGR1 structure AF-Q96P68-F1-model\_v2.

**A**

337 AA protein  
NP\_001333123

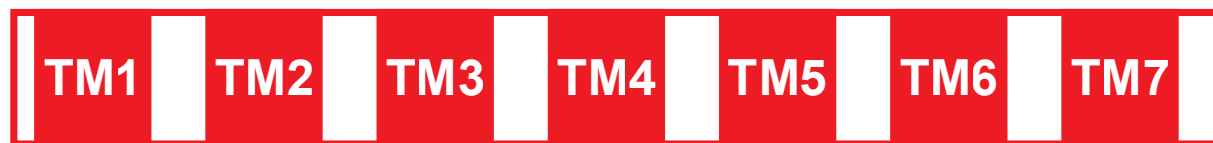

■ NBP2-42169

**B**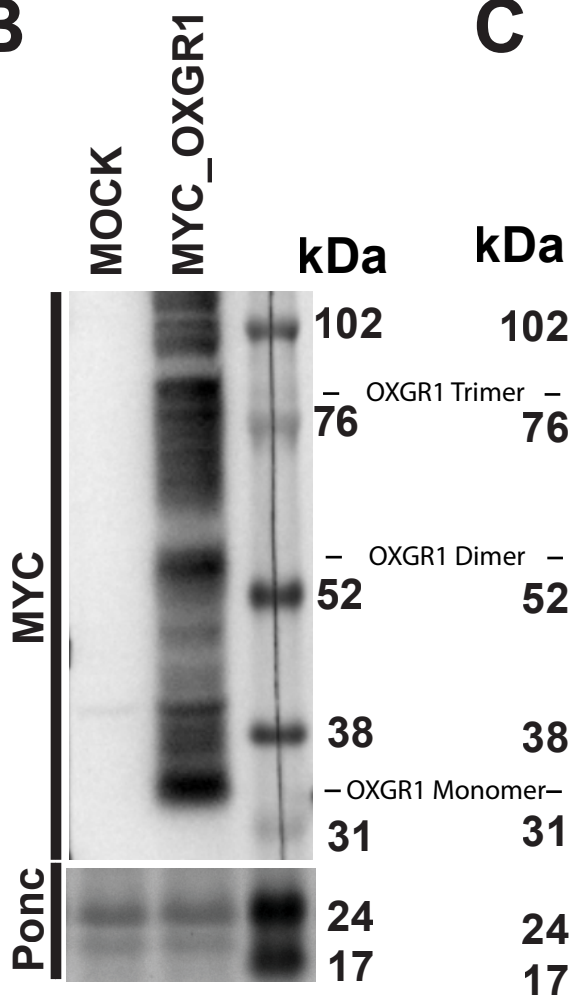**C**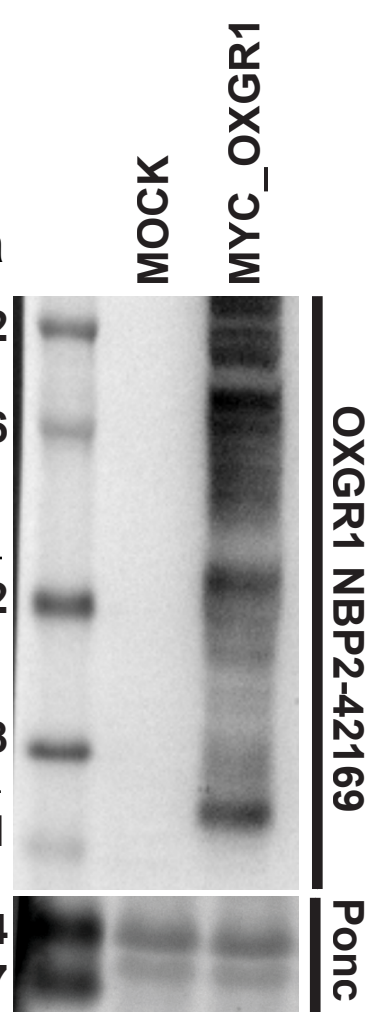**D**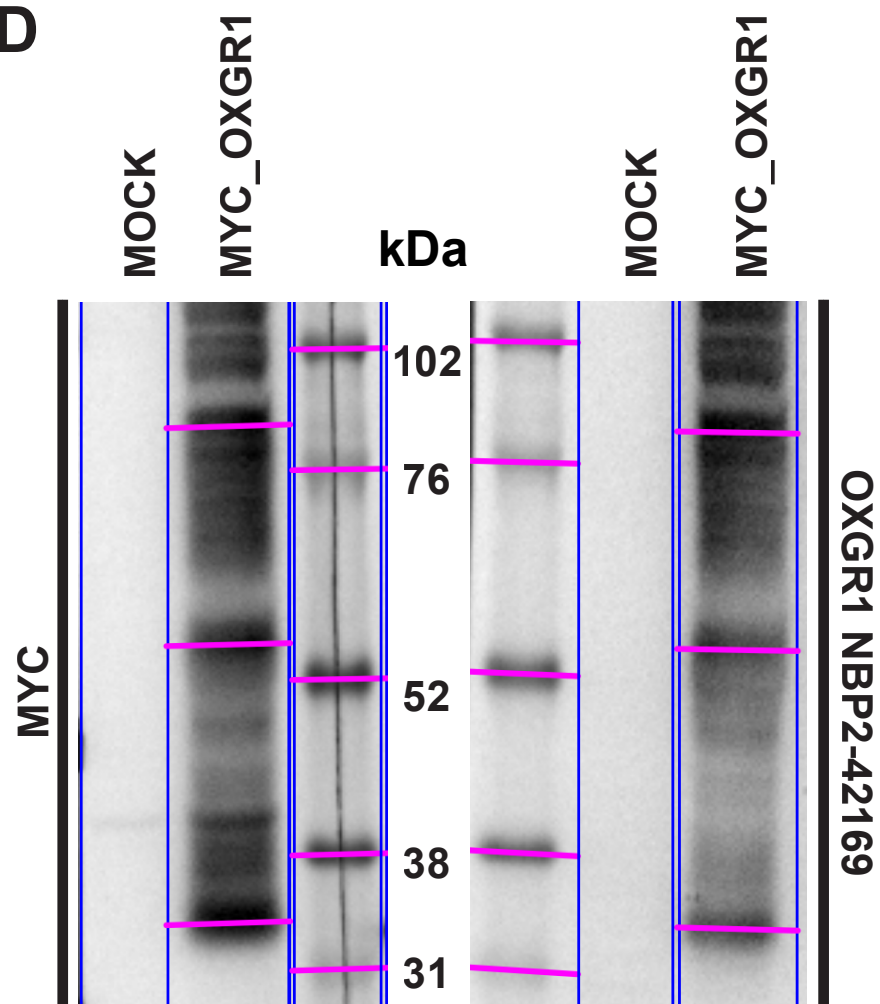**E**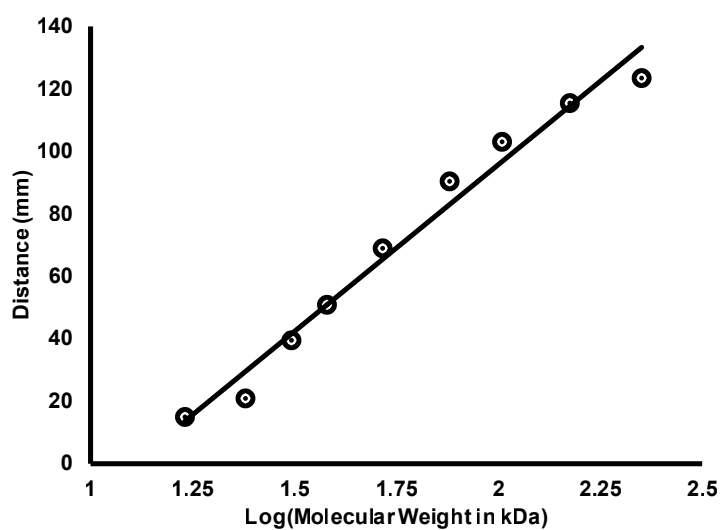**F**

| Antibody | Band | Distance (mm) | MW (kDa) | Ratio |
|----------|------|---------------|----------|-------|
| MYC      | 1    | 53            | 32.5     | 1.0   |
|          | 2    | 81.5          | 60.4     | 1.9   |
|          | 3    | 104           | 98.7     | 3.0   |
| OXGR1    | 1    | 54.5          | 32.5     | 1.0   |
|          | 2    | 82.5          | 60.1     | 1.8   |
|          | 3    | 104           | 96.4     | 3.0   |

**G**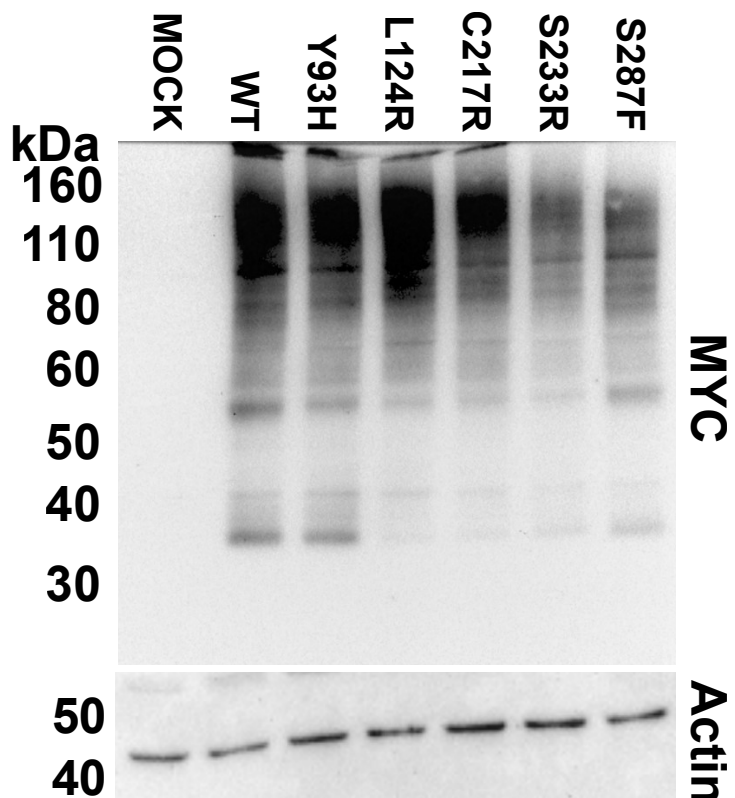**H**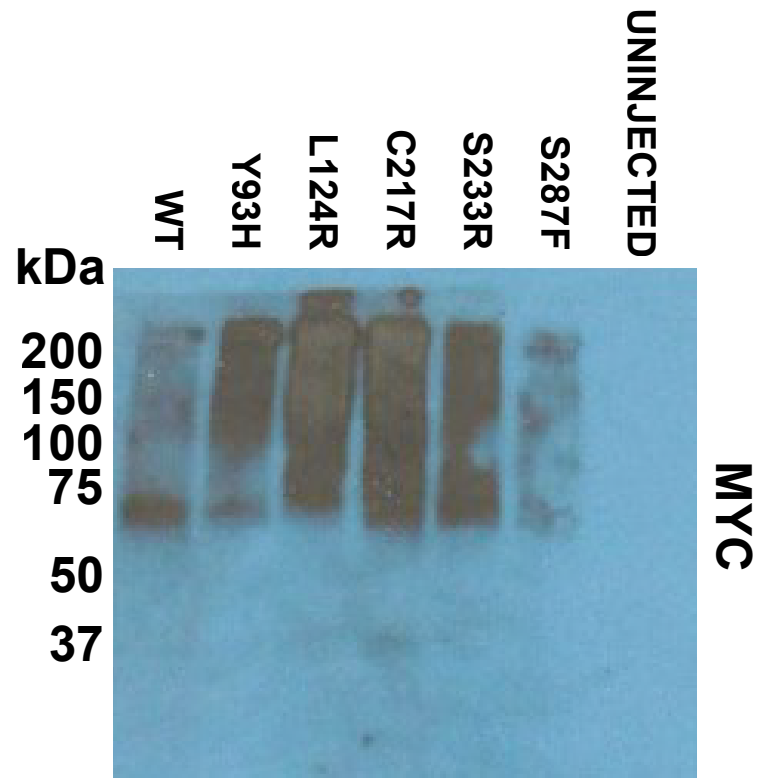

**Supplementary Figure 7. *OXGR1* cDNA expression results in multimeric banding pattern in HEK293T cell lines and in *Xenopus* oocytes that is not affected by NL/NC variants.**

**(A) Diagram of human *OXGR1* protein showing immunogen region for *OXGR1* antibody NBP2-42169.**

**(B) Anti-MYC tag and (C) anti-*OXGR1* immunoblots of clarified lysates from HEK293T cells transfected with mock MYC plasmid (MOCK) or N-terminal MYC-tagged wildtype *OXGR1* are shown. ~35 kDa monomeric *OXGR1* was detected as well as *OXGR1* oligomers.**

**(D) The bands of the protein standard ladder and major *OXGR1* oligomer bands from immunoblotting are overlaid with lines used to generate standard curve of molecular weight versus distance from the 10 kDa marker on protein ladder.**

**(E) Plot of logarithm of molecular weights of ladder protein standards relative to distance from bottom marker (10 kDa) is shown with trendline.**

**(F) Based on linear equation of trendline (E), estimated molecular weights of major *OXGR1* oligomeric bands from anti-MYC and anti-*OXGR1* immunoblotting in (D). These correspond to *OXGR1* monomers, dimers and trimers.**

**(G) Anti-MYC tag immunoblot of clarified lysates from HEK293T cells transfected with mock MYC plasmid (MOCK), N-terminal MYC-tagged wildtype *OXGR1*, or tagged constructs bearing NL/NC patient derived variants is shown.**

**(H) Anti-MYC tag immunoblot of clarified lysates from whole uninjected oocytes or from oocytes injected 48-72h previously with 50 ng cRNA encoding myc-tagged wild type *OXGR1* or the indicated *OXGR1* variants.**

**A**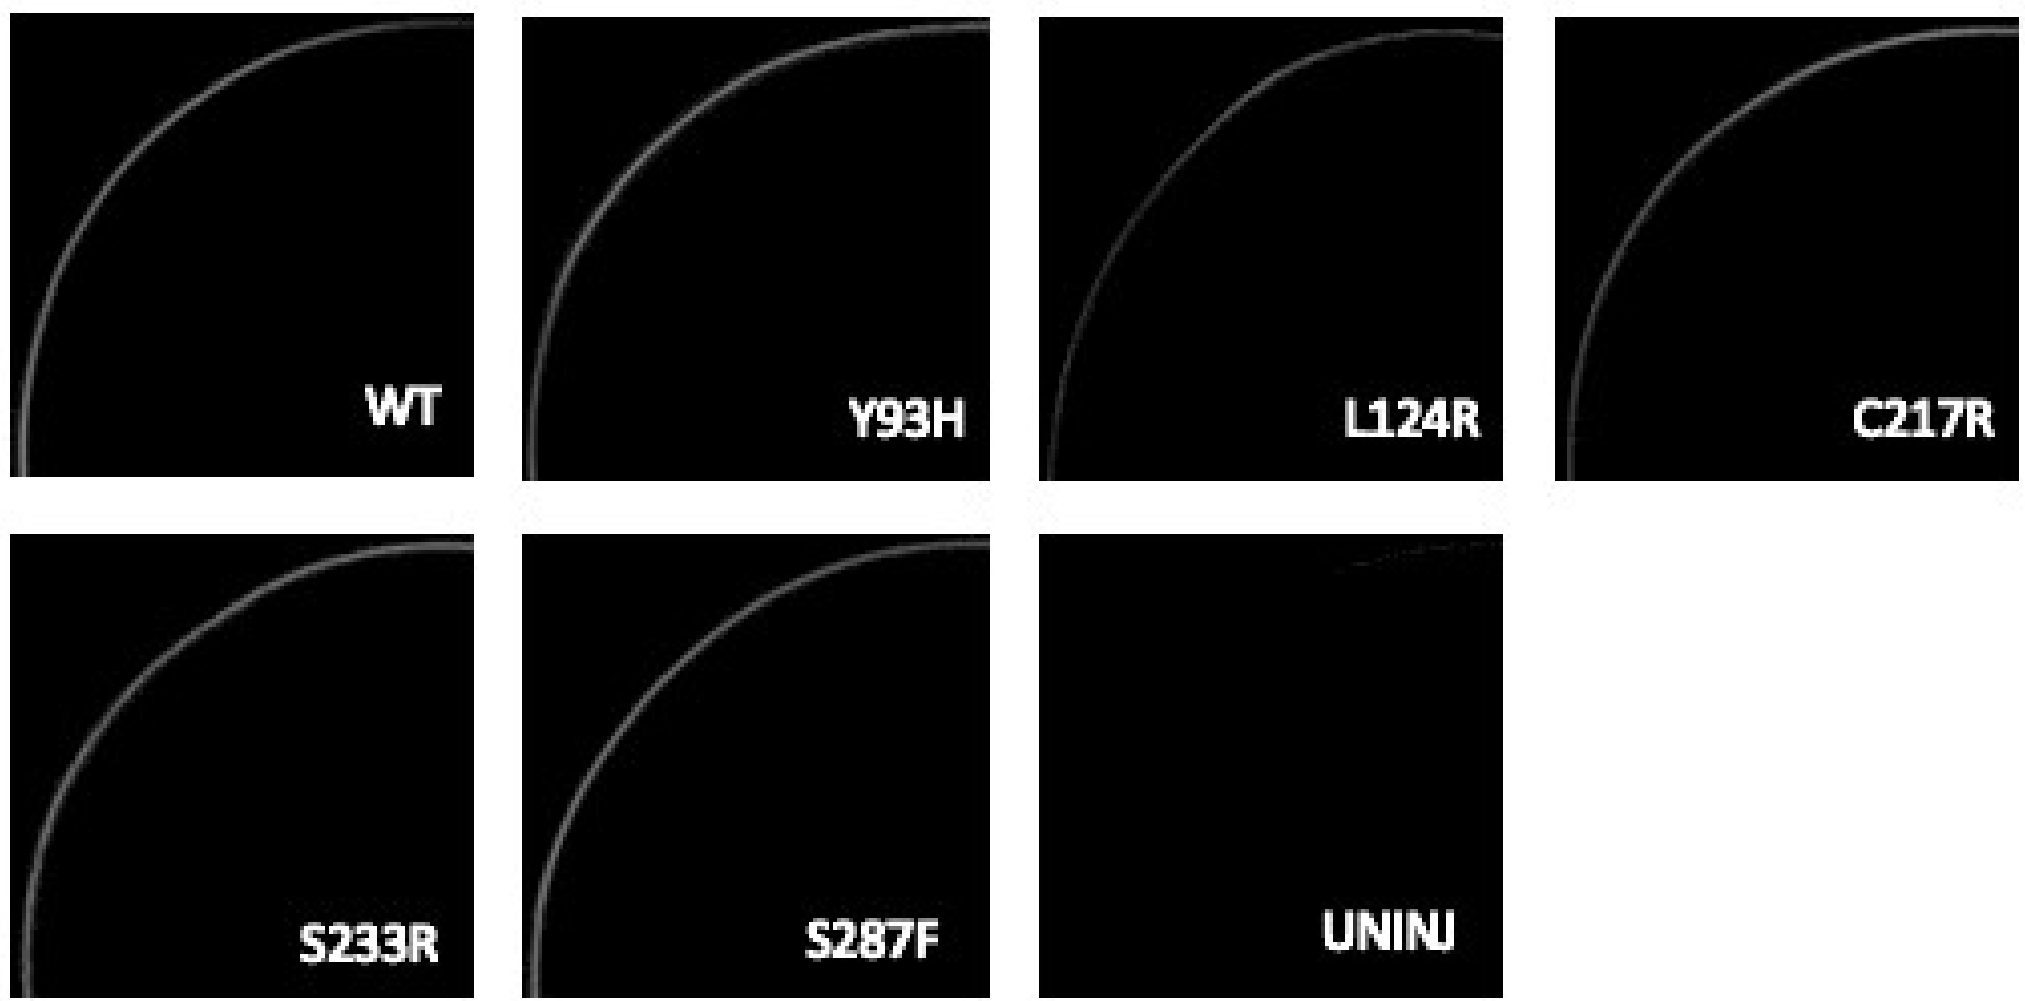**B**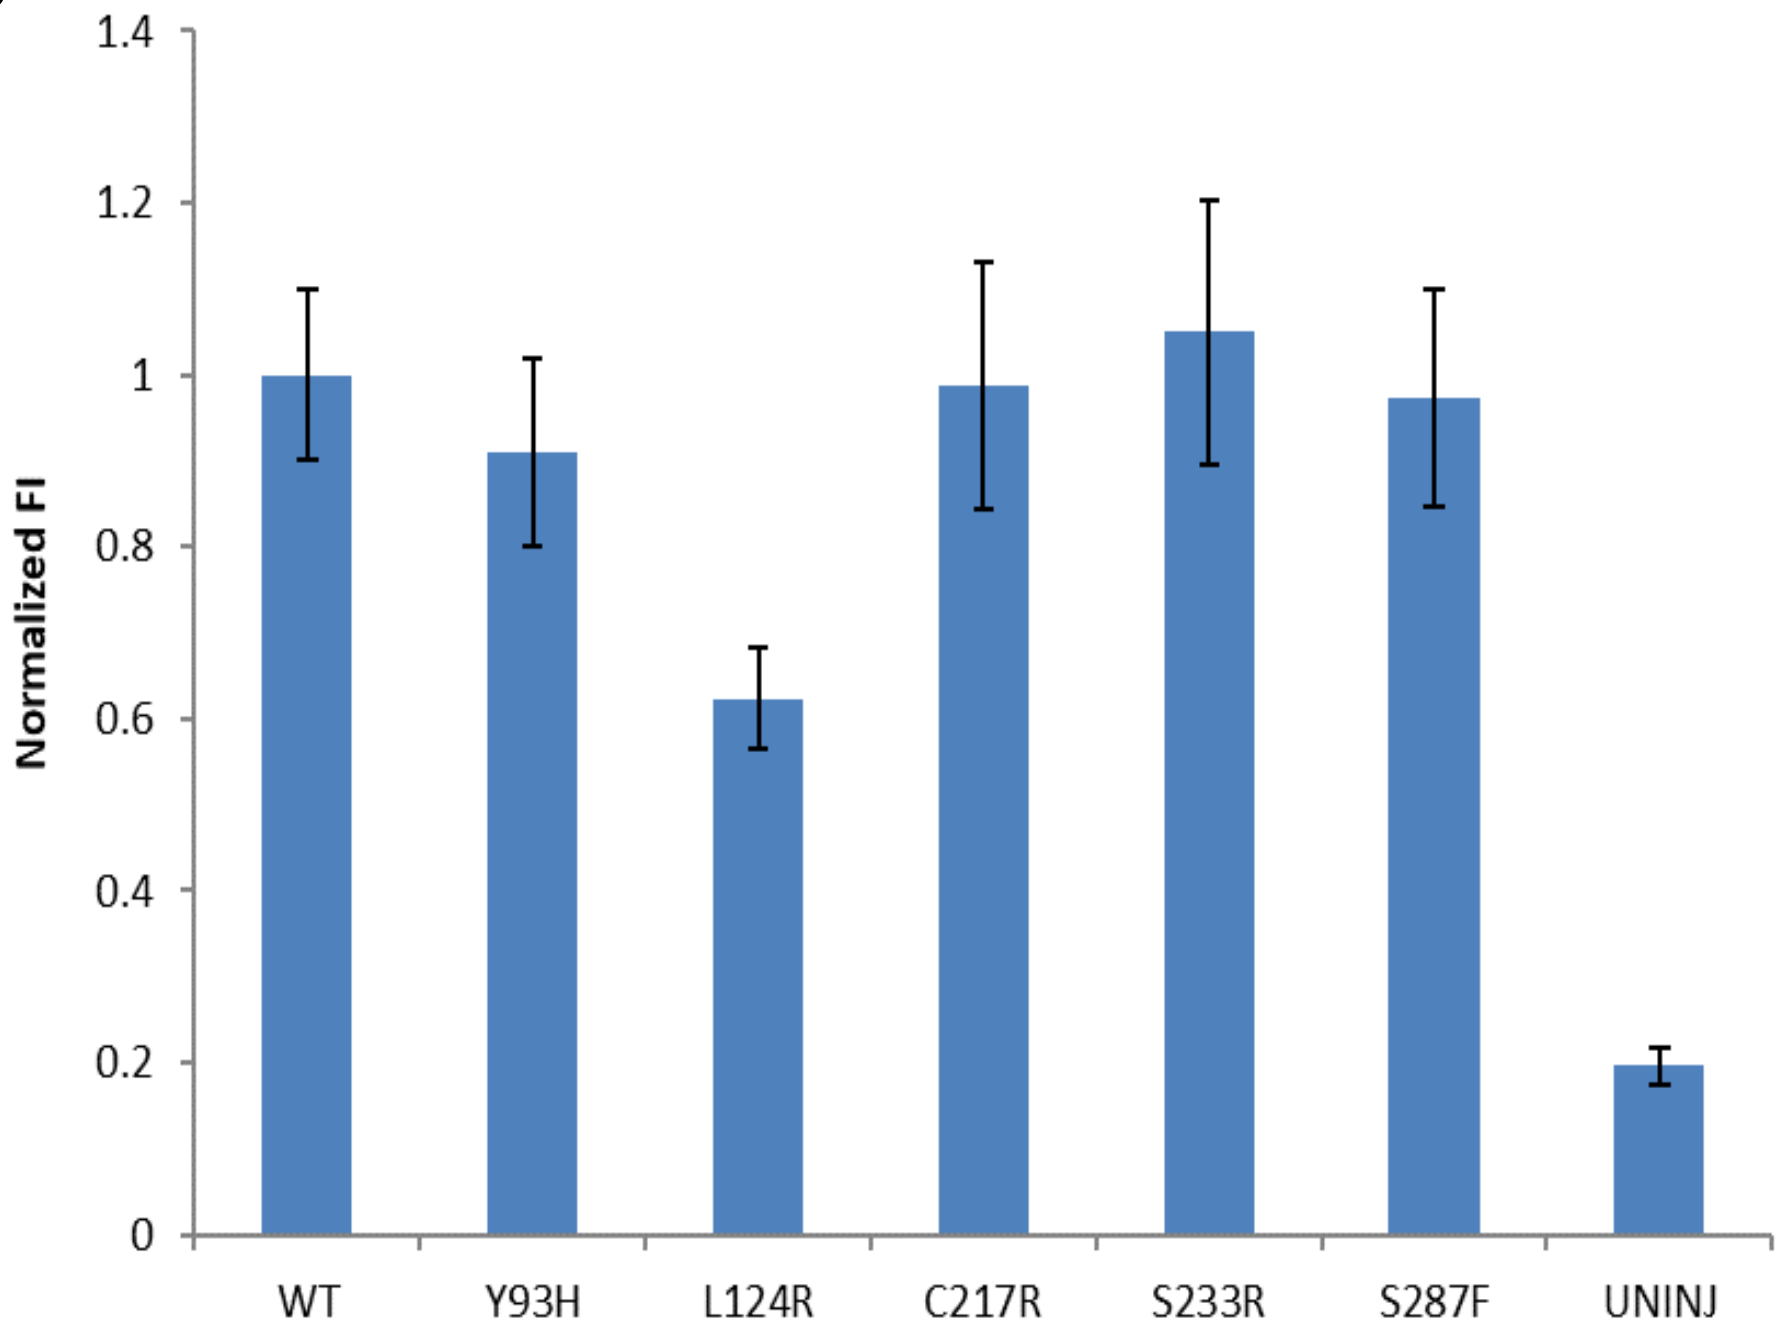

**Supplementary Figure 8. *OXGR1* cRNA expression results in expected expression at or near the surface of *Xenopus* oocytes that is not affected by NL/NC variants.**

**(A) Equatorial plane confocal sections of whole mount anti-MYC immunofluorescence micrographs of representative uninjected oocytes and oocytes injected 48-72 h previously with cRNA (50 ng) encoding C-terminal myc-tagged wild type *OXGR1* or the indicated variants.**

**(B) Histogram of immunofluorescence signal from (A) is displayed.**

**A.**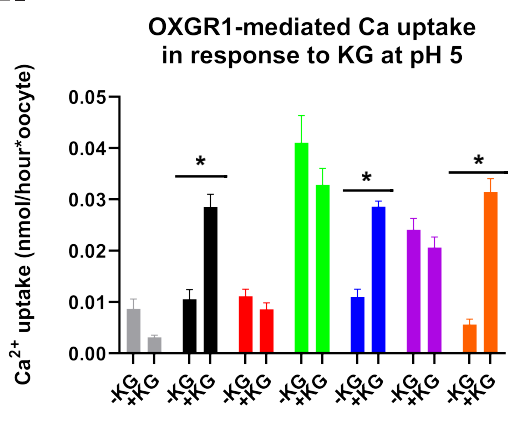**B.**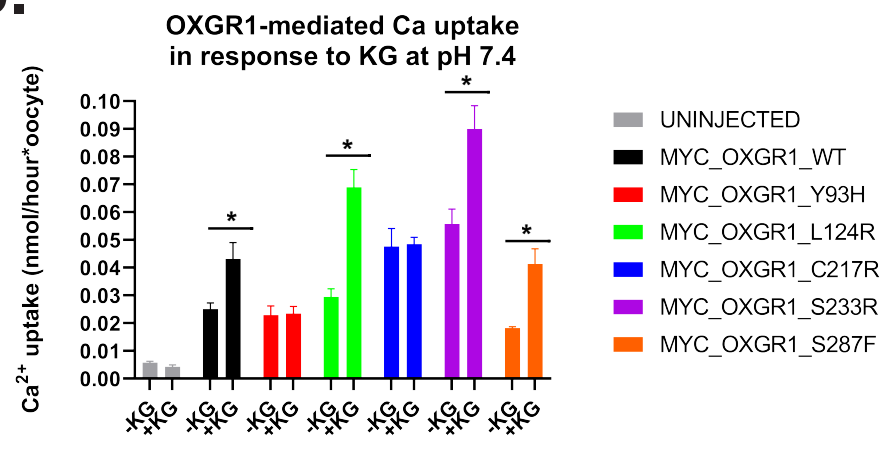

- UNINJECTED
- MYC\_OXGR1\_WT
- MYC\_OXGR1\_Y93H
- MYC\_OXGR1\_L124R
- MYC\_OXGR1\_C217R
- MYC\_OXGR1\_S233R
- MYC\_OXGR1\_S287F



**Supplementary Figure 9. OXGR1-mediated alpha-ketoglutarate dependent Ca<sup>2+</sup> uptake in *Xenopus* oocytes.**

- (A) Ca<sup>2+</sup> uptake into *Xenopus* oocytes injected 48-72 hours previously with water or with cRNA (40 ng) encoding wild type human OXGR1 or the indicated variants. Uptake was measured at bath pH 5.0 for 30 min in the absence (-KG) or presence (+KG) of bath alpha-ketoglutarate (1 mM). \*p<0.05 by Student's *t*-test.
- (B) Ca<sup>2+</sup> uptake into *Xenopus* oocytes injected 48-72 h previously with water or with cRNA (25 ng) was measured at bath pH 7.4 for 30 min in absence (-KG) or presence (+KG) of bath alpha-ketoglutarate (1 mM). \*p<0.05 by Student's *t*-test.
